# Supplementary material for: Site-specific C–H chalcogenation of quinoxalin-2(1H)-ones enabled by Selectfluor reagent
Source: Royal Society of Chemistry journal article supplement (doi:10.1039/d1qo01332g), 2021-01-01
Supplement: d1qo01332g1.pdf [file d1qo01332g1.pdf]

# Supporting Information

## Site-Specific C-H Chalcogenation of Quinoxalin-2(1*H*)-ones Enabled by Selectfluor Reagent

Jinwei Yuan,<sup>a,\*</sup> Yang Zhang,<sup>a</sup> Guangchao Huang,<sup>a</sup> Mengyao Ma,<sup>a</sup> Tengyu Yang,<sup>a</sup> Liangru Yang,<sup>a,\*</sup>

Shouren Zhang,<sup>b,\*</sup> Pu Mao,<sup>a</sup> Lingbo Qu<sup>c</sup>

<sup>a</sup> School of Chemistry & Chemical Engineering, Henan University of Technology, Zhengzhou 450001, P. R. China

<sup>b</sup> Henan Key Laboratory of Nanocomposites and Applications; Institute of Nanostructured Functional Materials, Huanghe Science and Technology College, Zhengzhou 450006, P. R. China

<sup>c</sup> College of Chemistry, Zhengzhou University, Zhengzhou 450001, P. R. China

**\*Corresponding authors:**

**E-mail:** [yuanjinweigs@126.com](mailto:yuanjinweigs@126.com) (Jinwei Yuan)

---

## Contents

|    |                                                                                        |    |
|----|----------------------------------------------------------------------------------------|----|
| 1  | General information.....                                                               | 1  |
| 2  | Screening the reaction conditions.....                                                 | 1  |
| 3  | Copies of spectra of products .....                                                    | 2  |
| 4  | Crystal structure and crystal data for compound 3b.....                                | 44 |
| 5. | <sup>1</sup> H NMR spectra of Selectfluor, PhSeSePh, PhSeSePh + Selectfluor, etc ..... | 52 |

## 1 General information

All commercial reagents and solvents were used without purification. TLC analyses were carried out on pre-coated silica gel plates with  $F_{254}$  indicator by UV light (254 nm and 365 nm). Purification of reaction products was carried out by flash chromatography using 300-400 mesh silica. NMR spectra were recorded on a Bruker Avance 400 MHz spectrometer. Chemical shifts for  $^1\text{H}$  NMR spectra are recorded in parts per million from tetramethylsilane. Data were reported as follows: chemical shift, multiplicity (s = singlet, d = doublet, t = triplet, m = multiplet and br = broad), coupling constant in Hz and integration. Chemical shifts for  $^{13}\text{C}$  NMR spectra were recorded in parts per million from tetramethylsilane. High resolution mass spectra (HR MS) were obtained on Thermo Scientific LTQ Orbitrap XL instrument using the ESI technique. IR spectra were recorded on Shimadzu IR-408 Fourier transform infrared spectrophotometer using a thin film supported on KBr pellets. Melting points were measured on an XT4A microscopic apparatus uncorrected.

## 2 Screening the reaction conditions

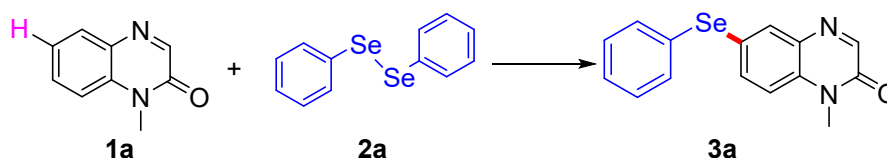

**Table S1** Screening the molar ratio of **1a** and **2a**<sup>a</sup>

| Entry | the molar ratio of <b>1a</b> and <b>2a</b> | Yields (%) <sup>b</sup> |
|-------|--------------------------------------------|-------------------------|
| 1     | 1:0.5                                      | 43                      |
| 2     | 1:1                                        | 75                      |
| 3     | 1:1.5                                      | 75                      |
| 4     | 1:2                                        | 75                      |

<sup>a</sup> Reaction conditions: 4-methylquinoline **1a** (0.2 mmol, 28.6 mg), diphenyl diselenide **2a**, Selectfluor agent (0.5 mmol, 177.0 mg) in  $\text{CH}_3\text{CN}$  (2.0 mL) at 80 °C for 3.0 h.

<sup>b</sup> Isolated yield.

### 3 Copies of spectra of products

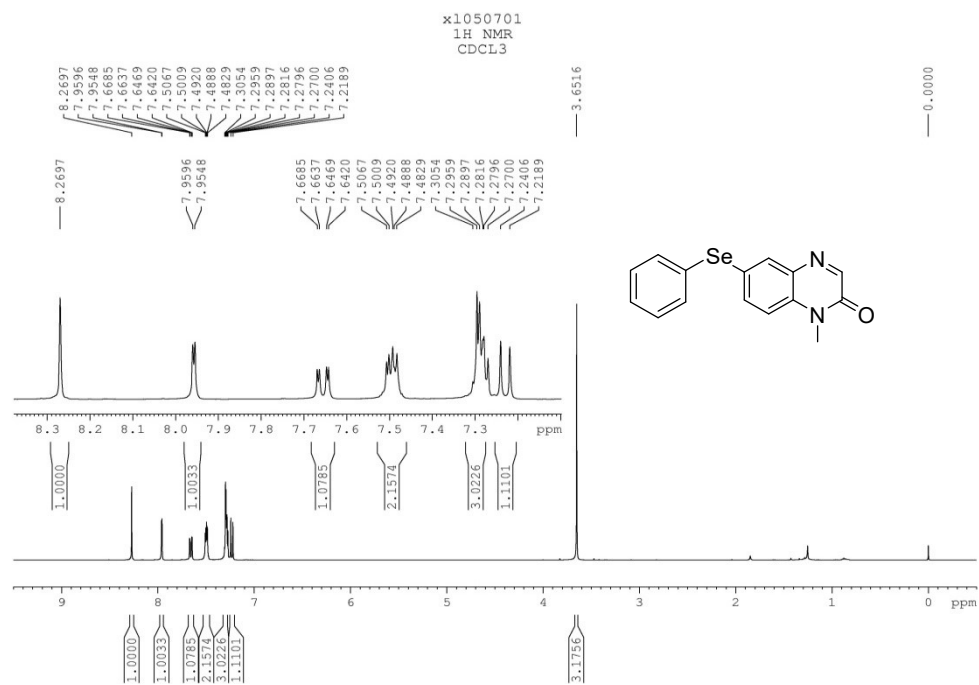

Fig. S1 <sup>1</sup>H NMR spectrum of compound 3a

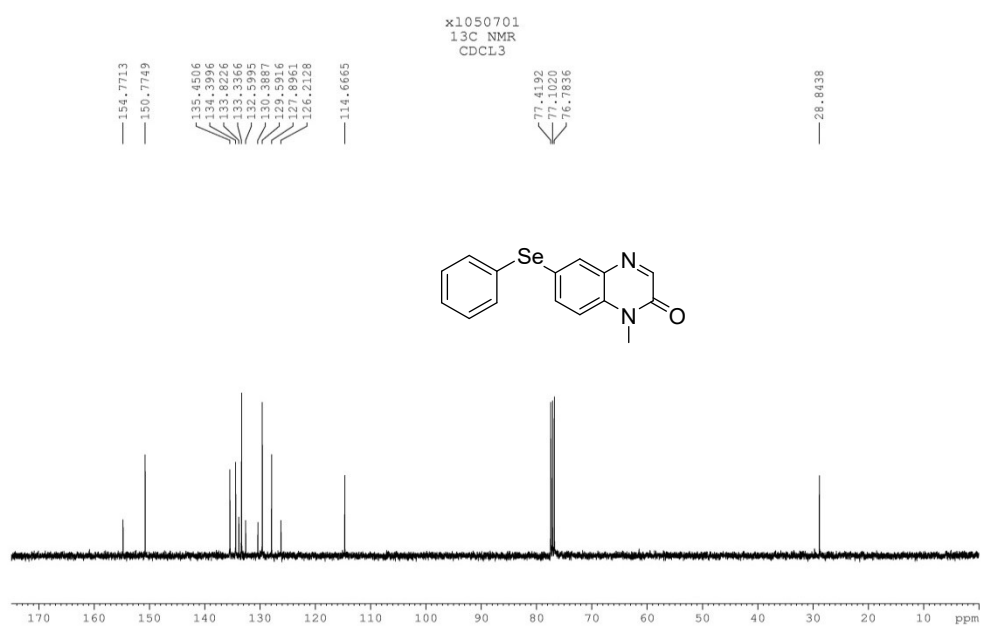

Fig. S2 <sup>13</sup>C NMR spectrum of compound 3a

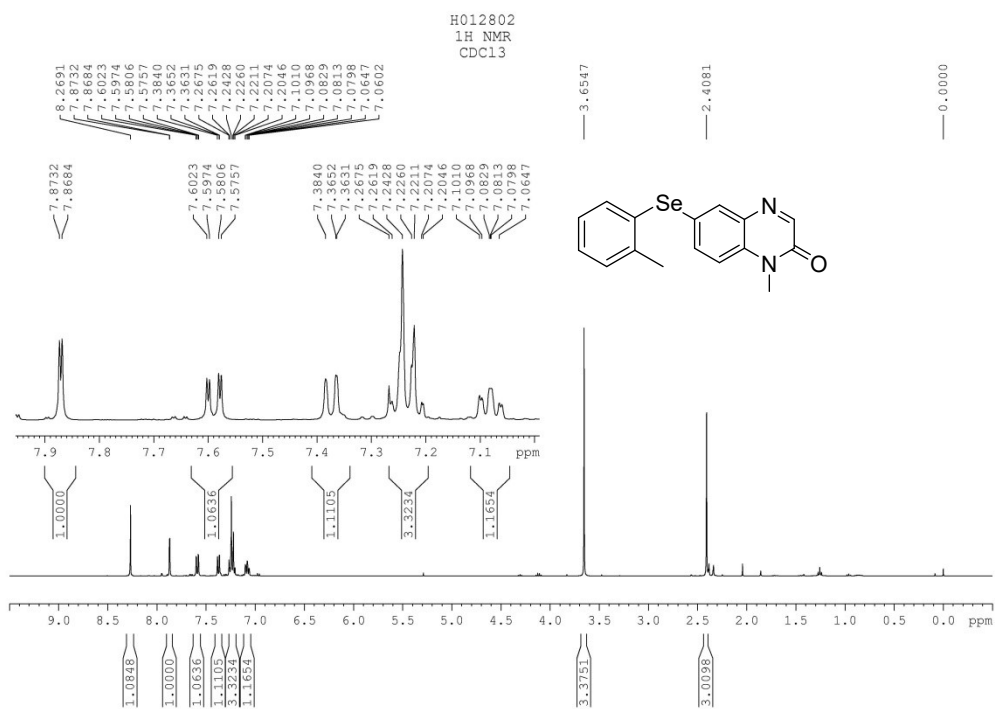

Fig. S3 <sup>1</sup>H NMR spectrum of compound 3b

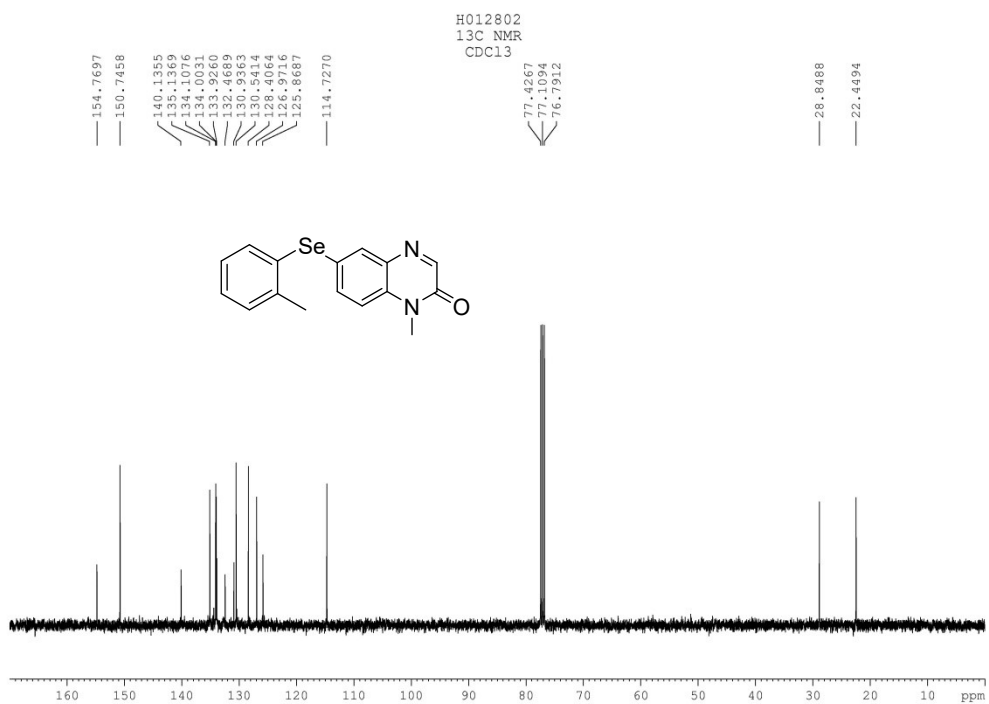

Fig. S4 <sup>13</sup>C NMR spectrum of compound 3b

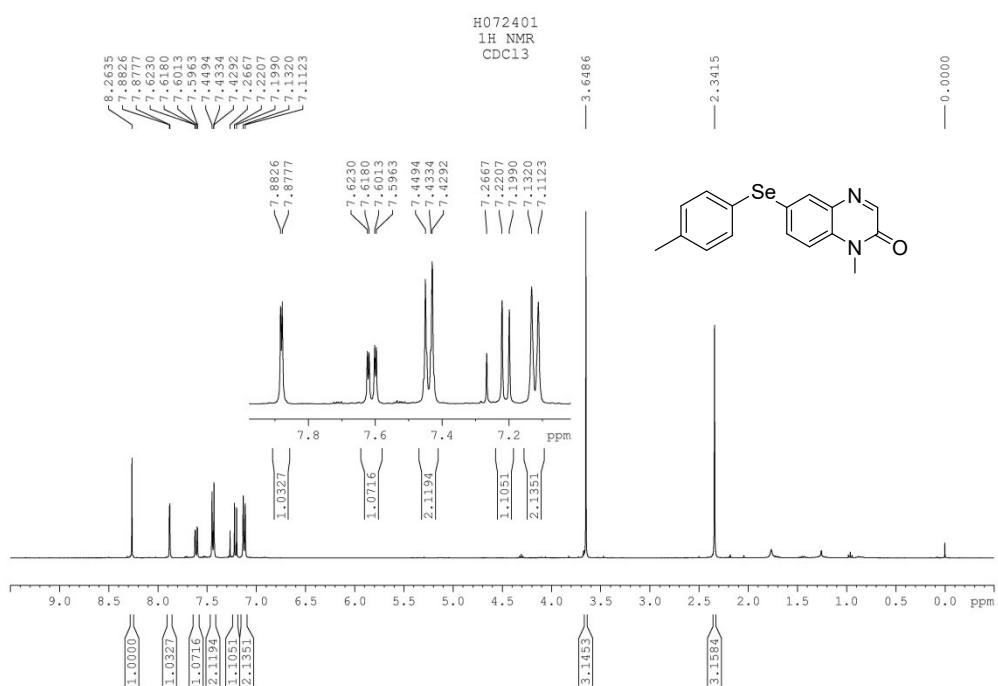

Fig. S5 <sup>1</sup>H NMR spectrum of compound 3c

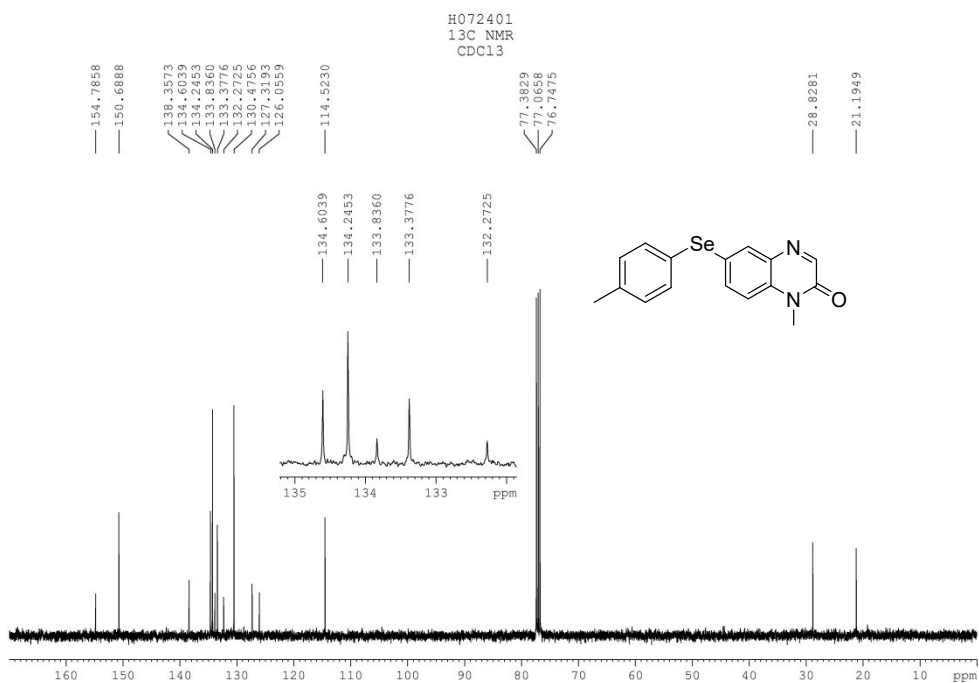

Fig. S6 <sup>13</sup>C NMR spectrum of compound 3c

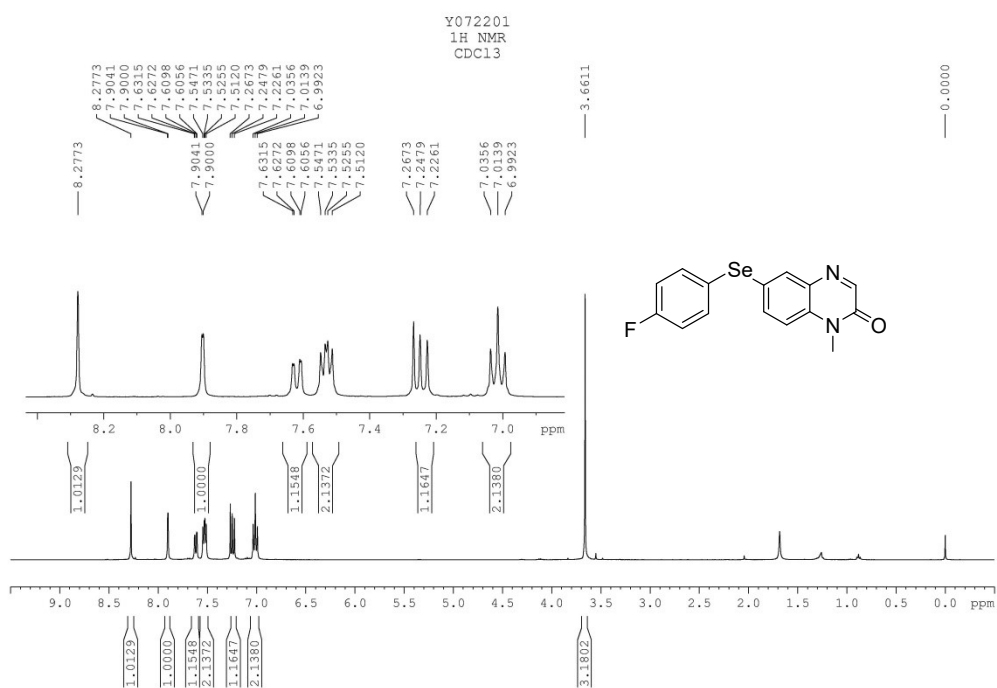

Fig. S7 <sup>1</sup>H NMR spectrum of compound 3d

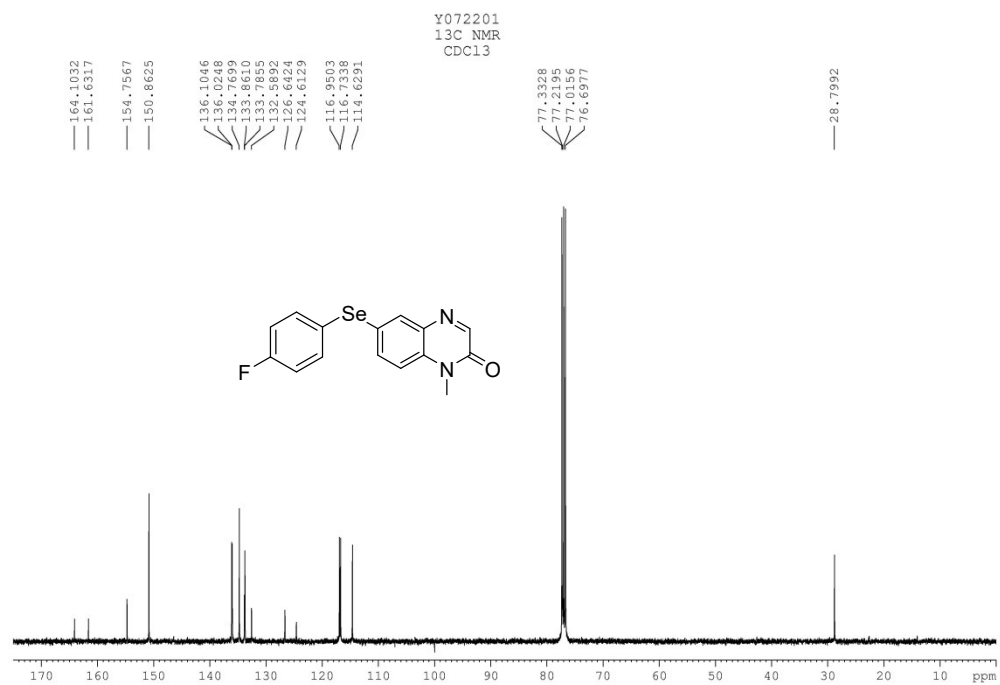

Fig. S8 <sup>13</sup>C NMR spectrum of compound 3d

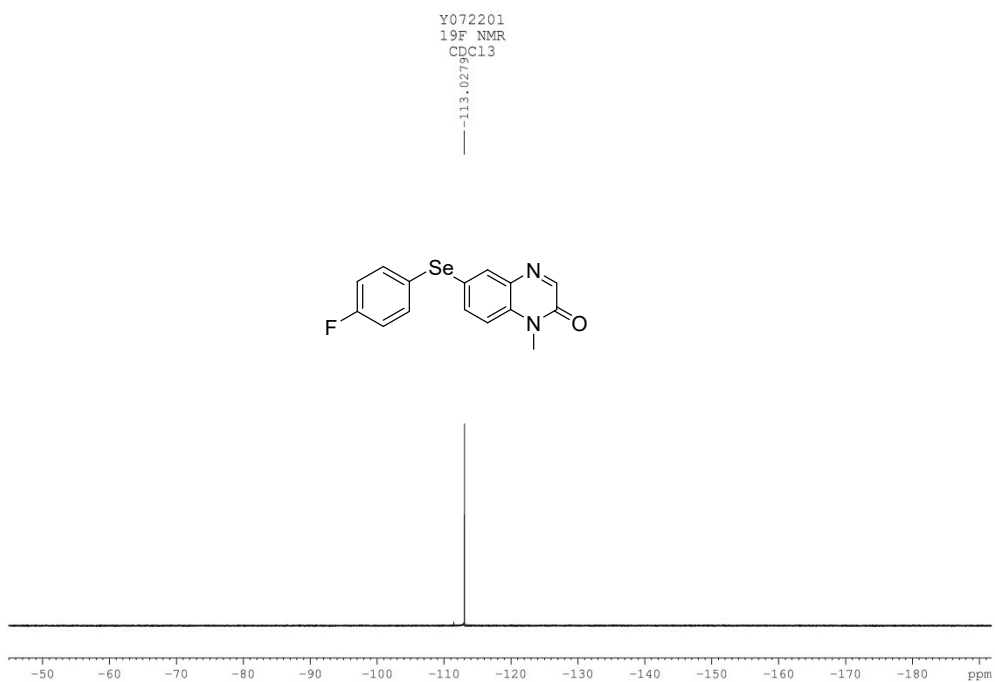

Fig. S9 <sup>19</sup>F NMR spectrum of compound **3d**

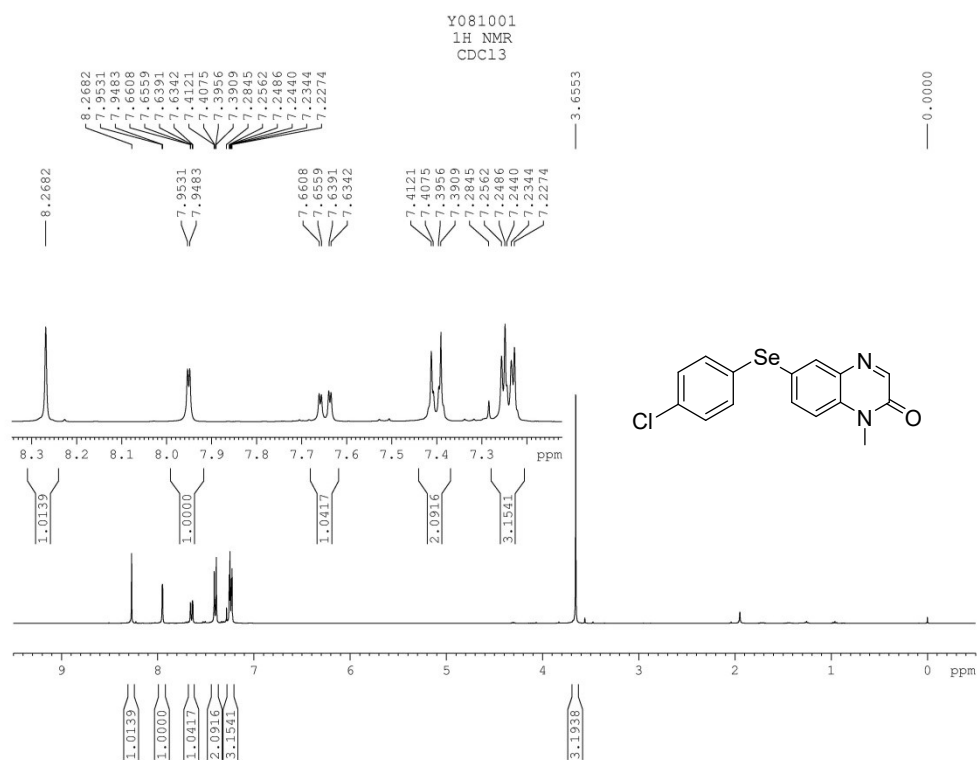

Fig. S10 <sup>1</sup>H NMR spectrum of compound **3e**

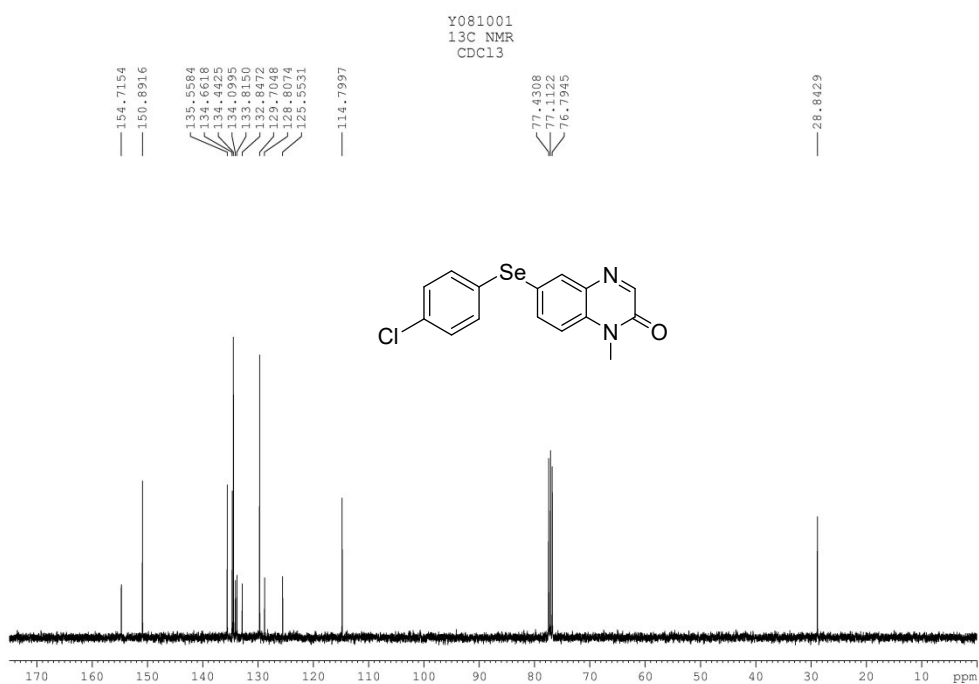

Fig. S11 <sup>13</sup>C NMR spectrum of compound 3e

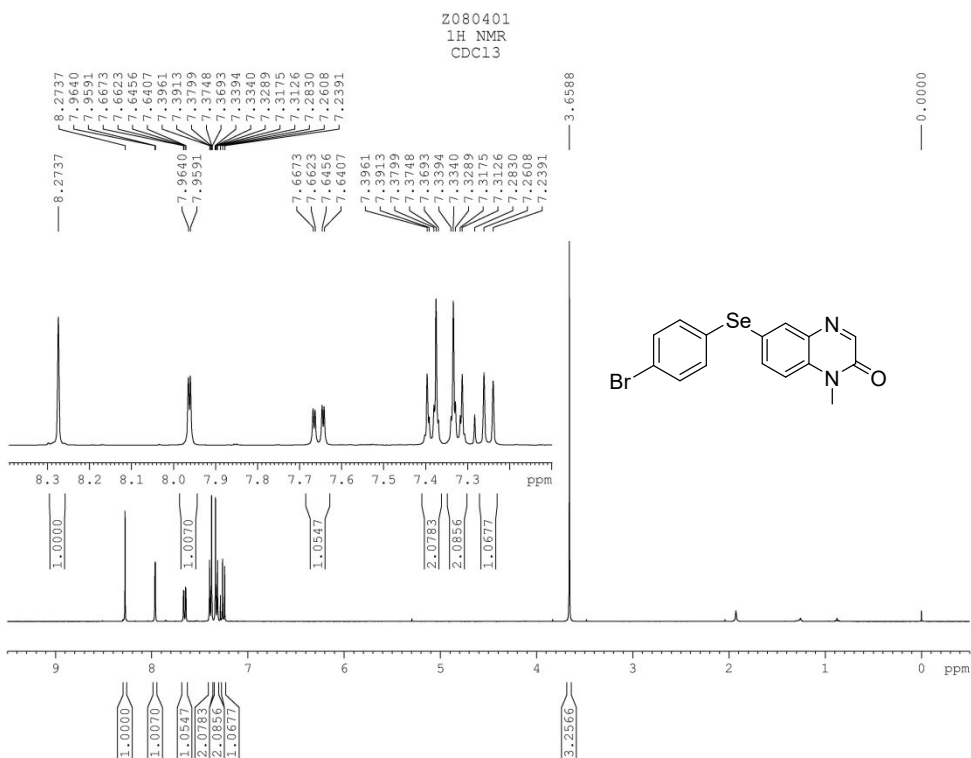

Fig. S12 <sup>1</sup>H NMR spectrum of compound 3f



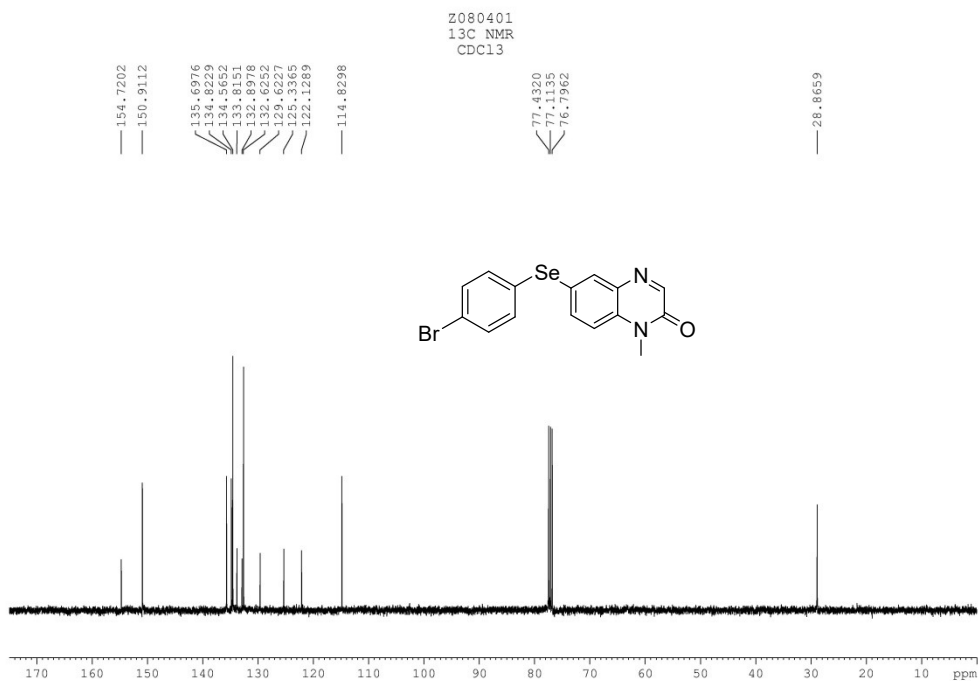

Fig. S13 <sup>13</sup>C NMR spectrum of compound 3f

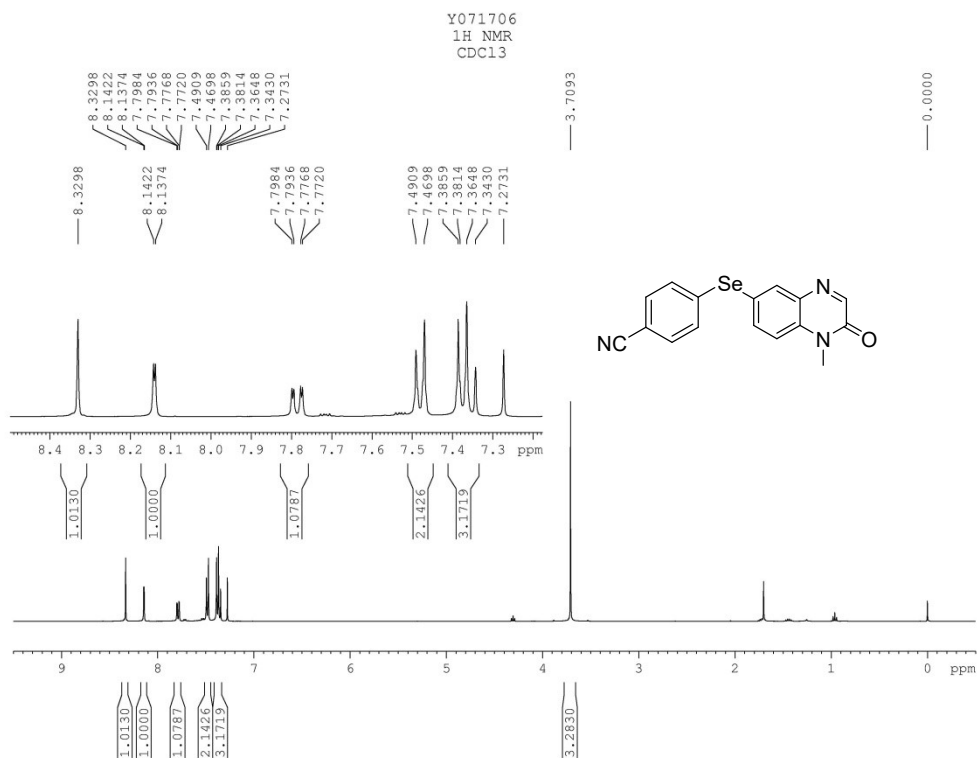

Fig. S14 <sup>1</sup>H NMR spectrum of compound 3g

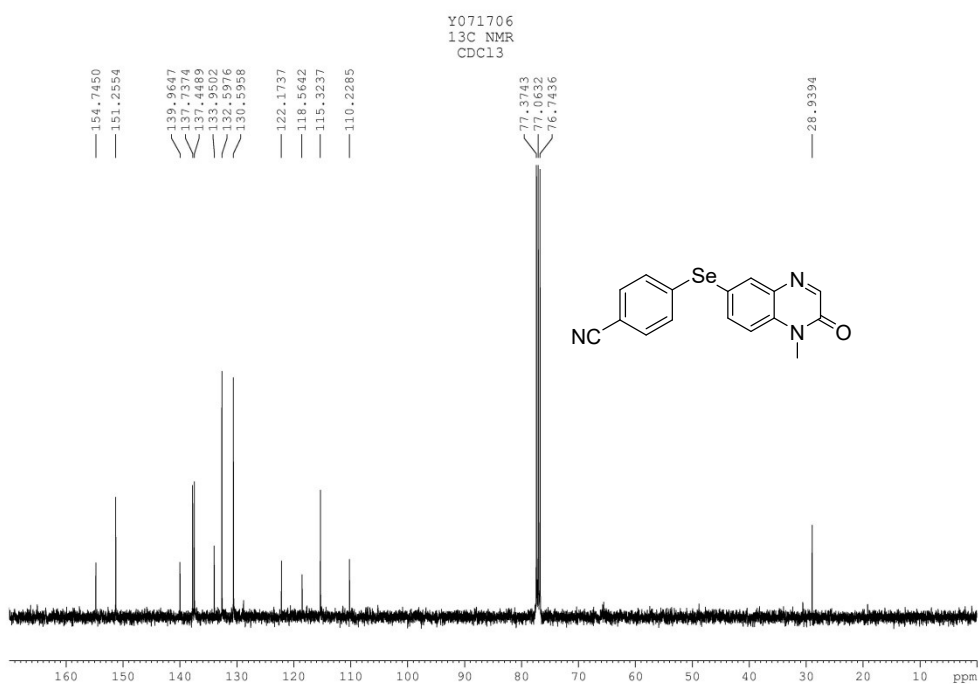

Fig. S15 <sup>13</sup>C NMR spectrum of compound 3g

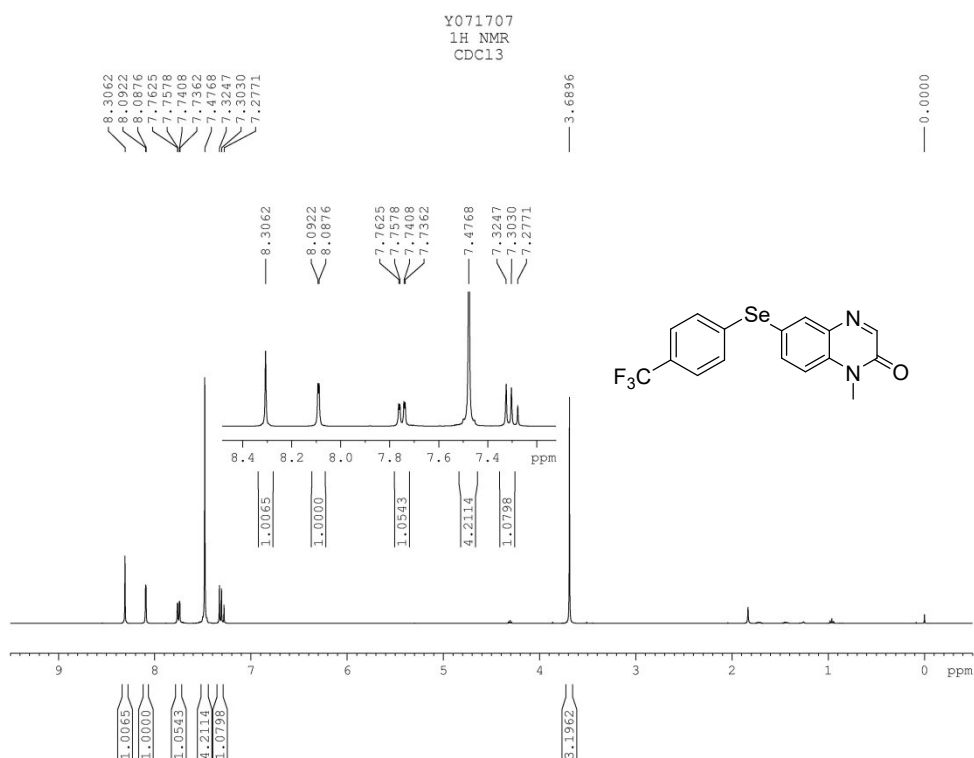

Fig. S16 <sup>1</sup>H NMR spectrum of compound 3h

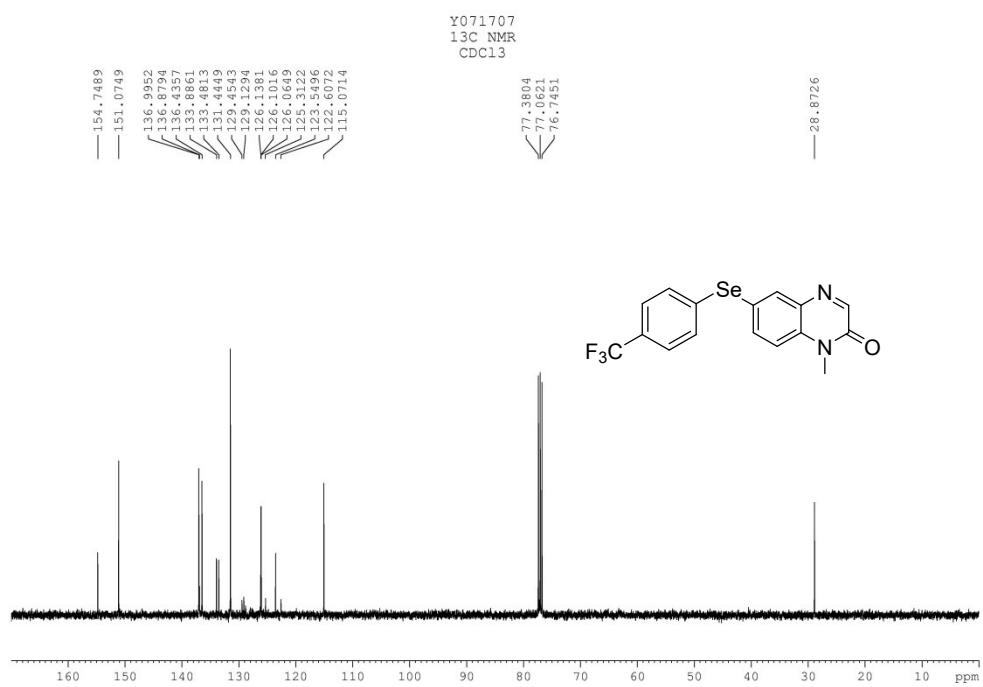

Fig. S17 <sup>13</sup>C NMR spectrum of compound 3h

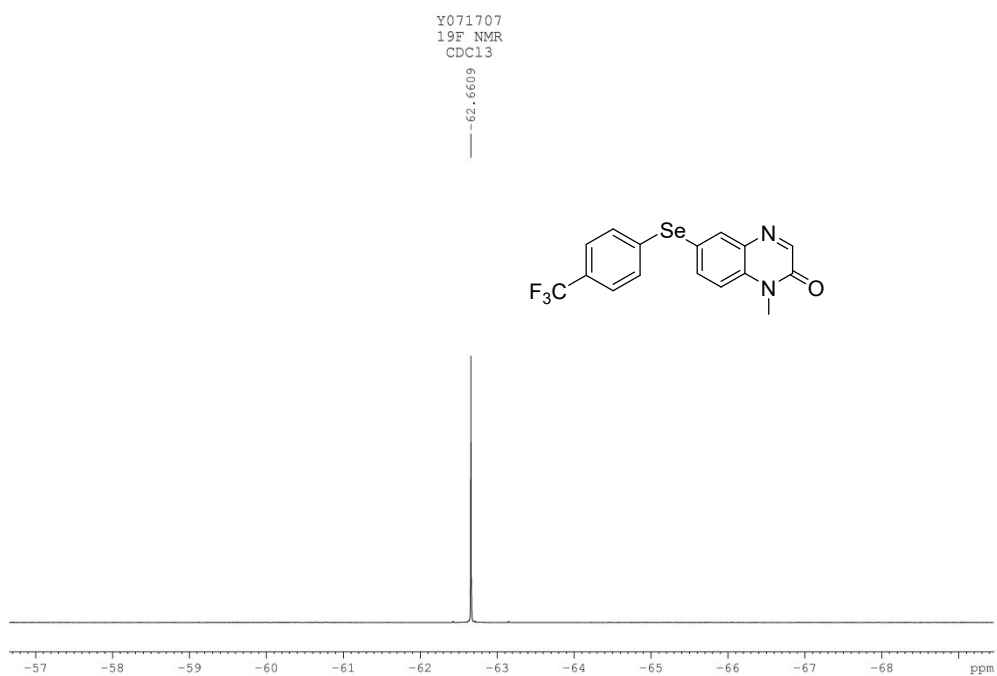

Fig. S18 <sup>19</sup>F NMR spectrum of compound 3h

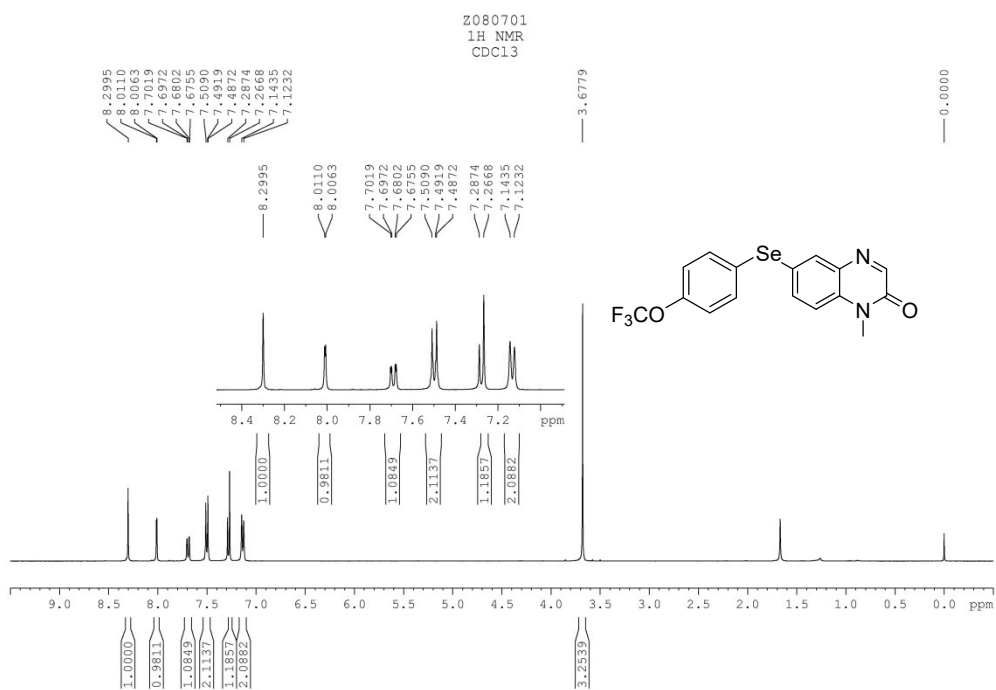

Fig. S19 <sup>1</sup>H NMR spectrum of compound 3i

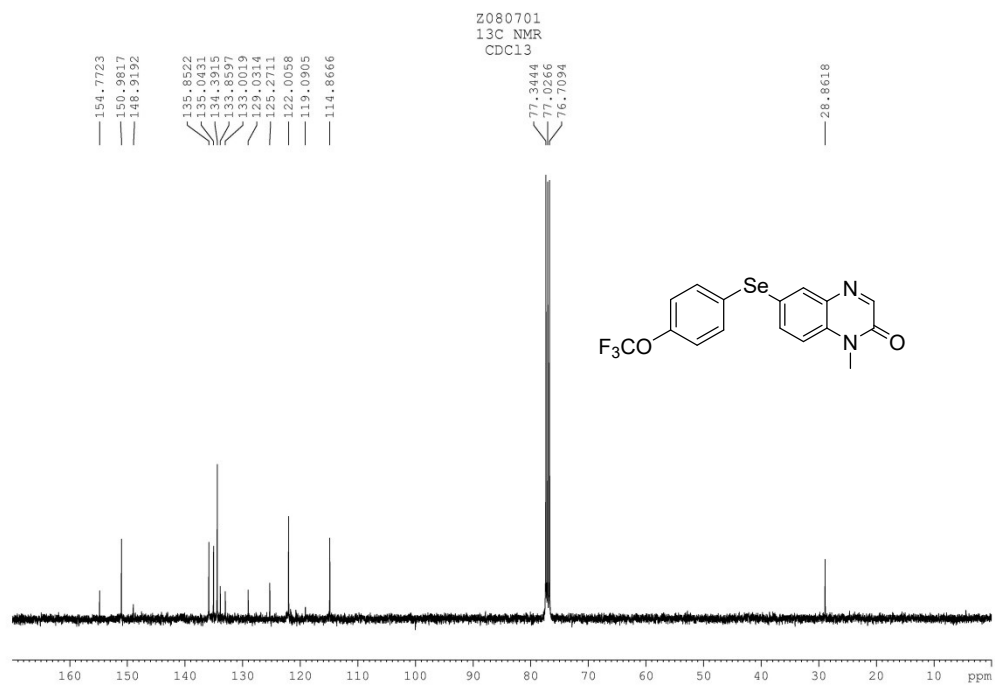

Fig. S20 <sup>13</sup>C NMR spectrum of compound 3i

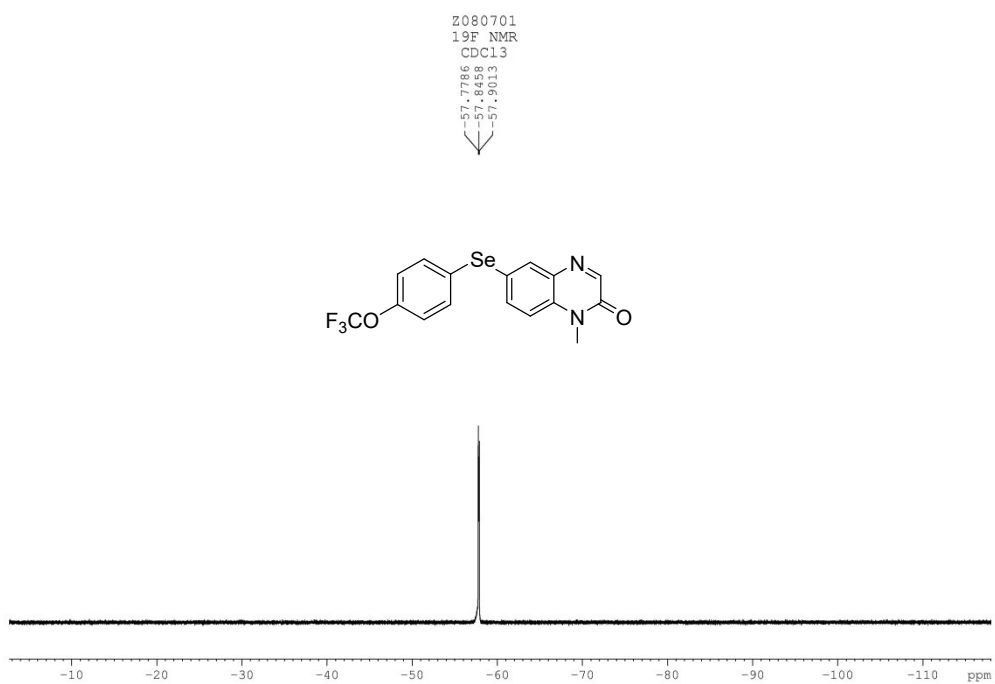

Fig. S21 <sup>19</sup>F NMR spectrum of compound **3i**

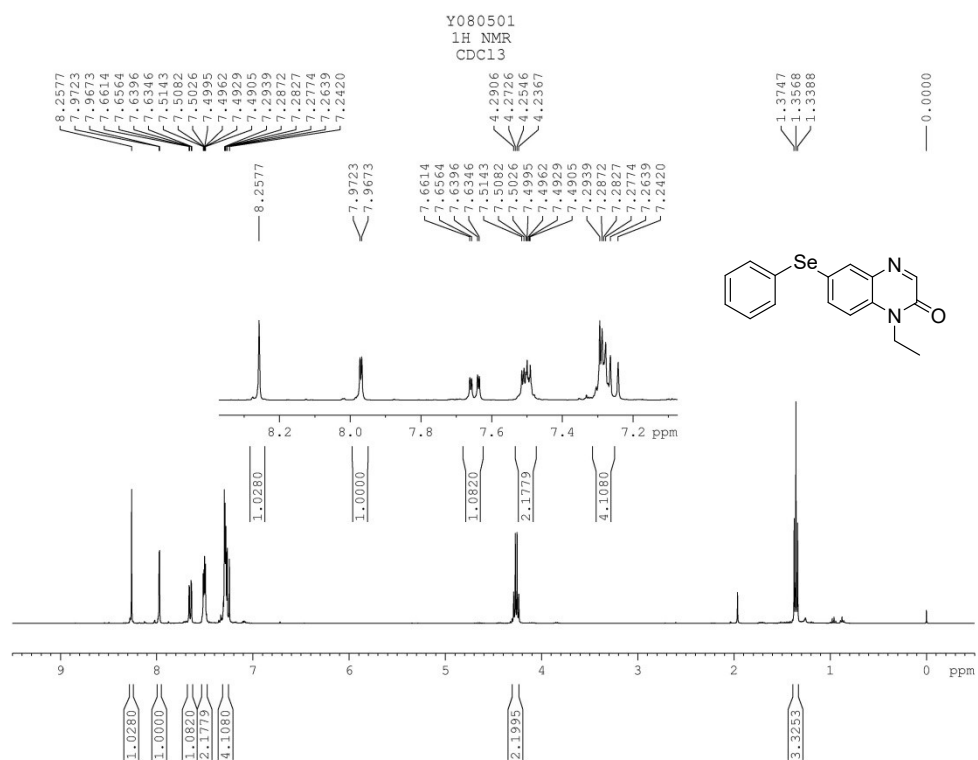

Fig. S22 <sup>1</sup>H NMR spectrum of compound **3k**

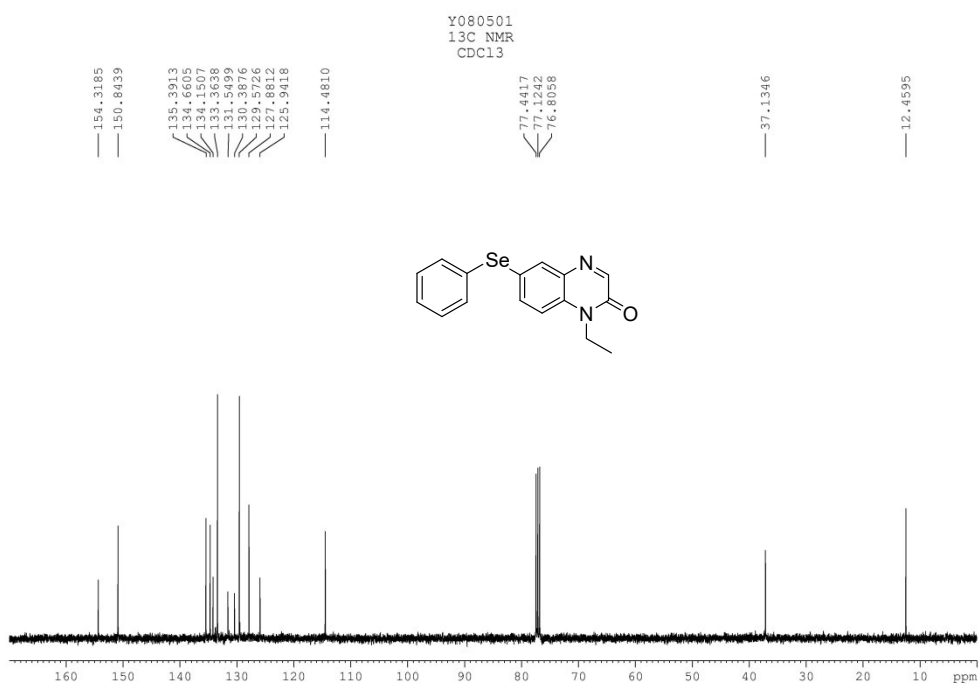

Fig. S23 <sup>13</sup>C NMR spectrum of compound 3k

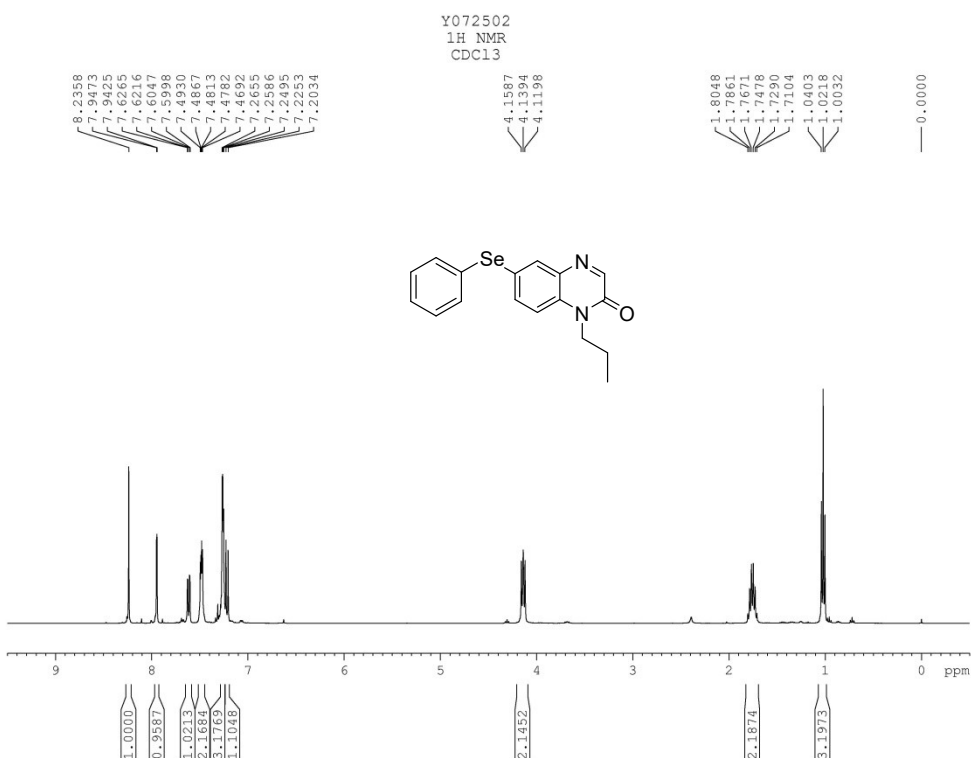

Fig. S24 <sup>1</sup>H NMR spectrum of compound 3l

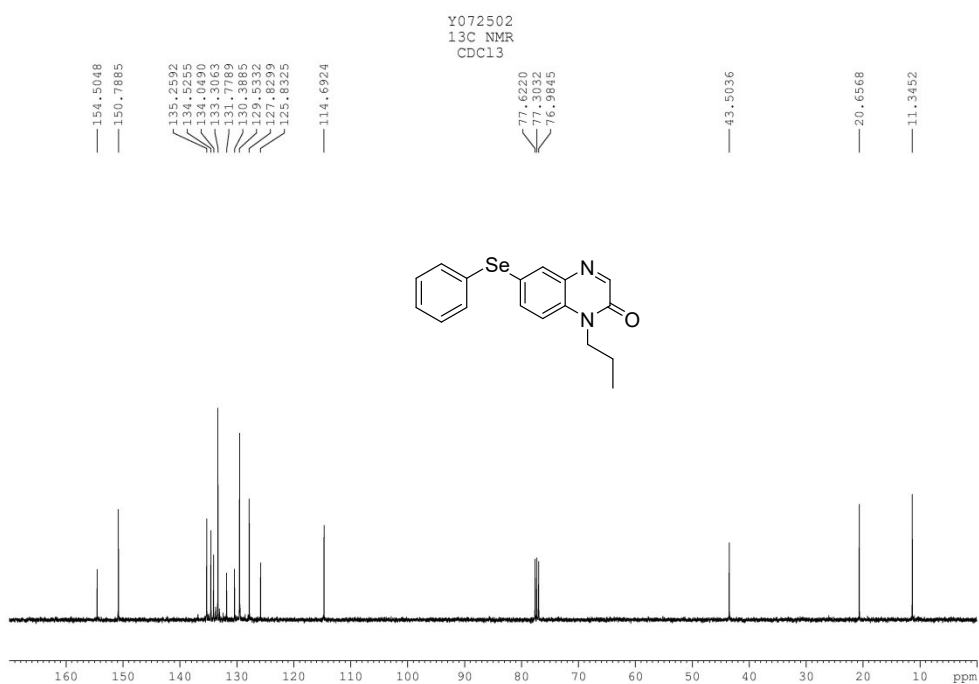

Fig. S25 <sup>13</sup>C NMR spectrum of compound 3l

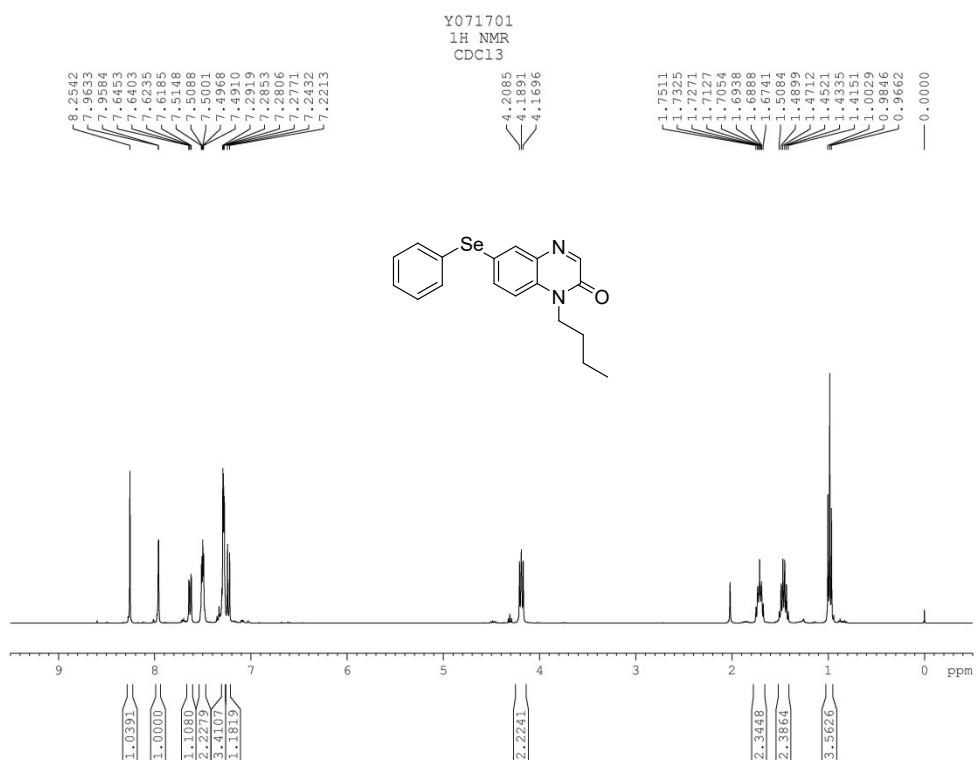

Fig. S26 <sup>1</sup>H NMR spectrum of compound 3m

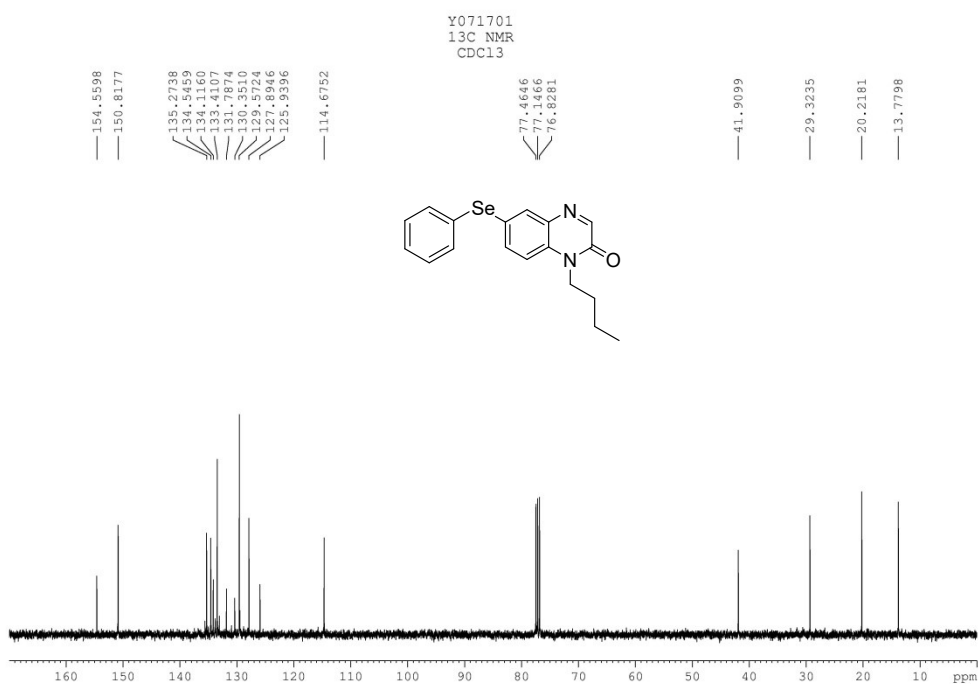

Fig. S27 <sup>13</sup>C NMR spectrum of compound 3m

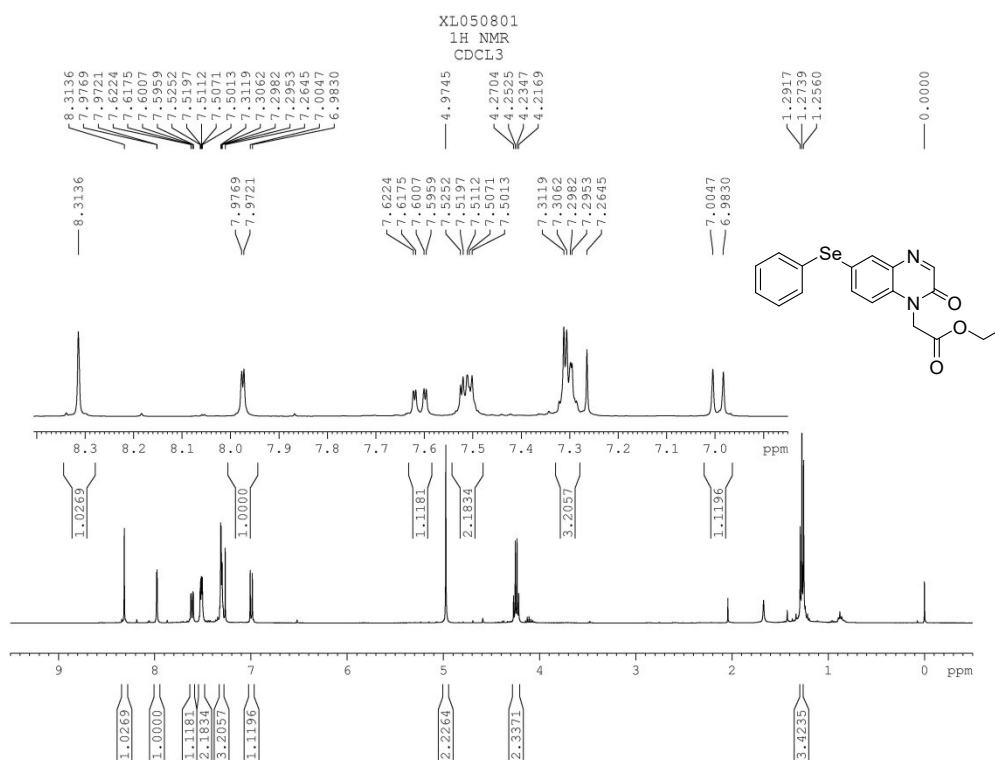

Fig. S28 <sup>1</sup>H NMR spectrum of compound 3n



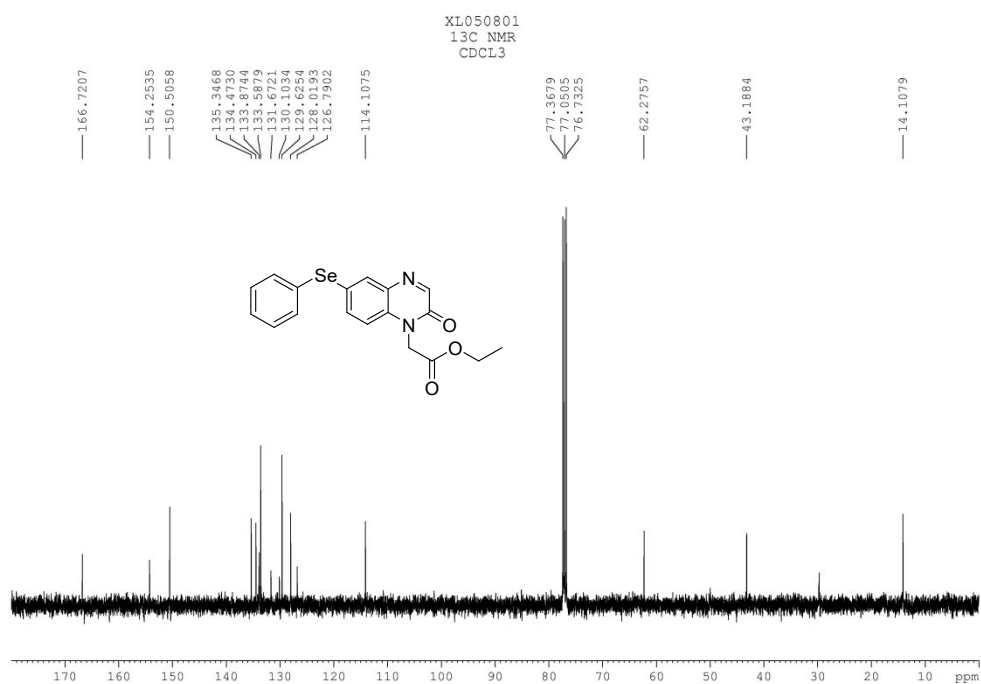

Fig. S29 <sup>13</sup>C NMR spectrum of compound 3n

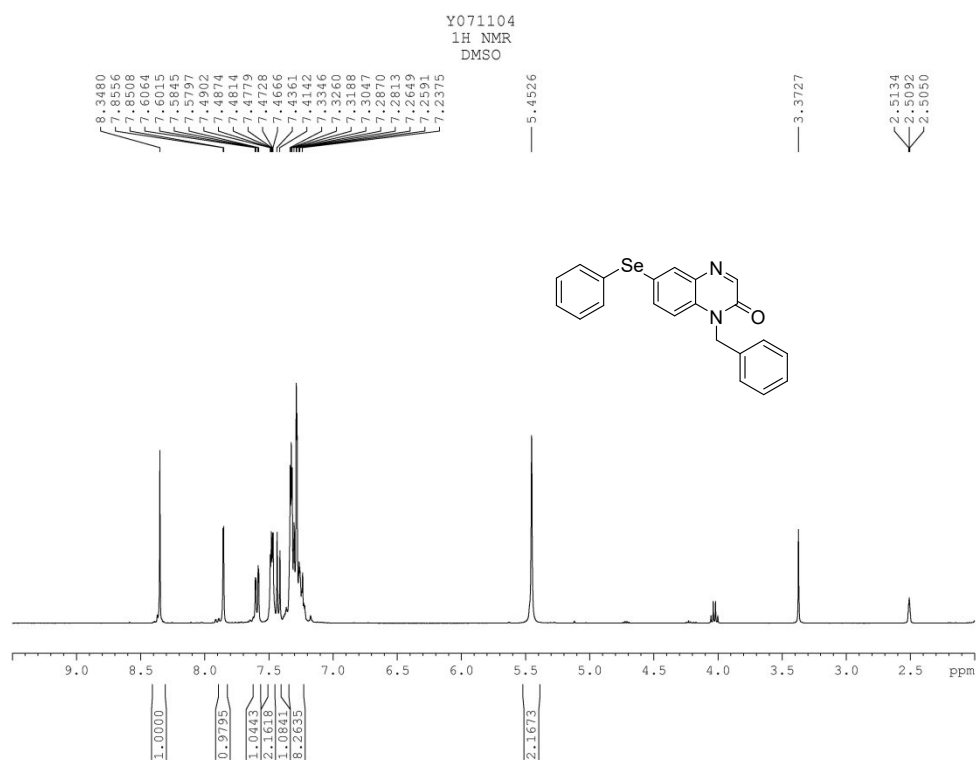

Fig. S30 <sup>1</sup>H NMR spectrum of compound 3o

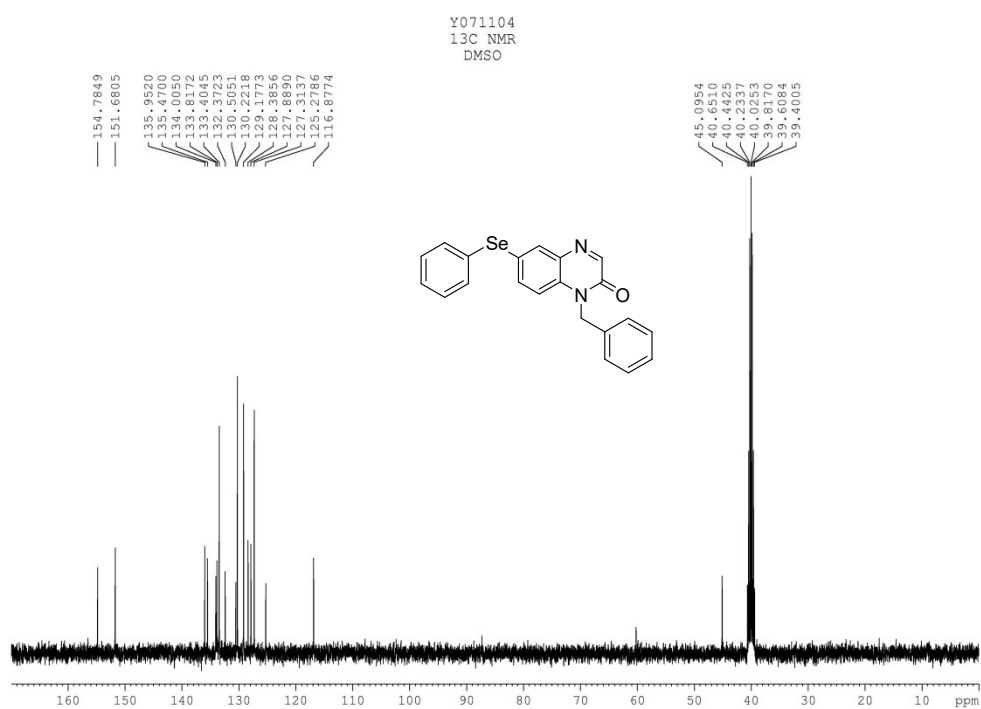

Fig. S31 <sup>13</sup>C NMR spectrum of compound 3o

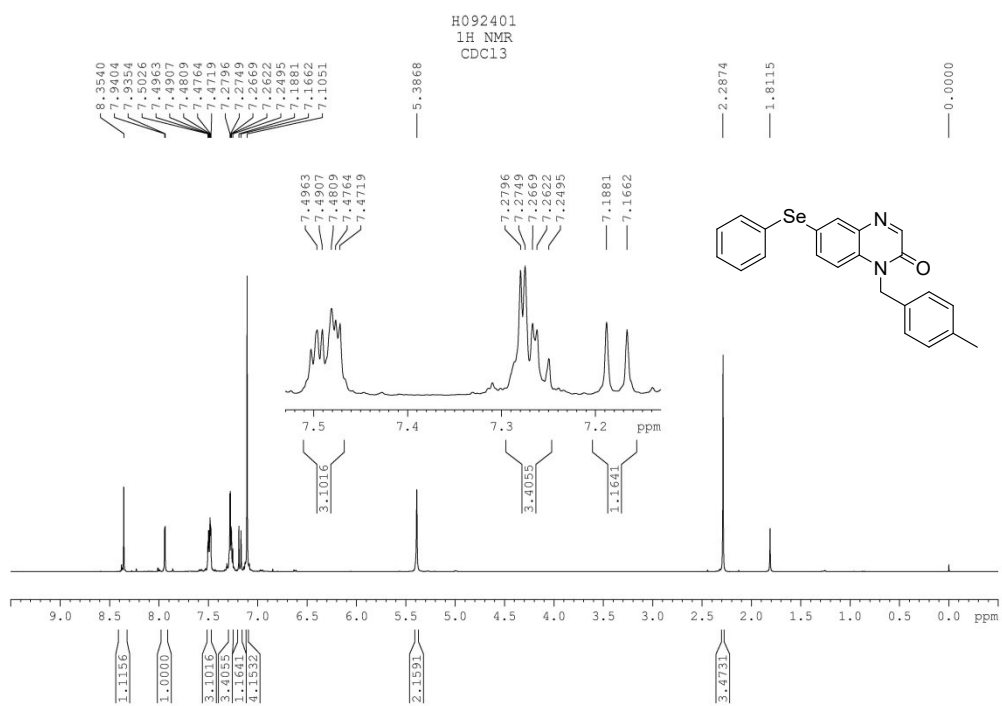

Fig. S32 <sup>1</sup>H NMR spectrum of compound 3p

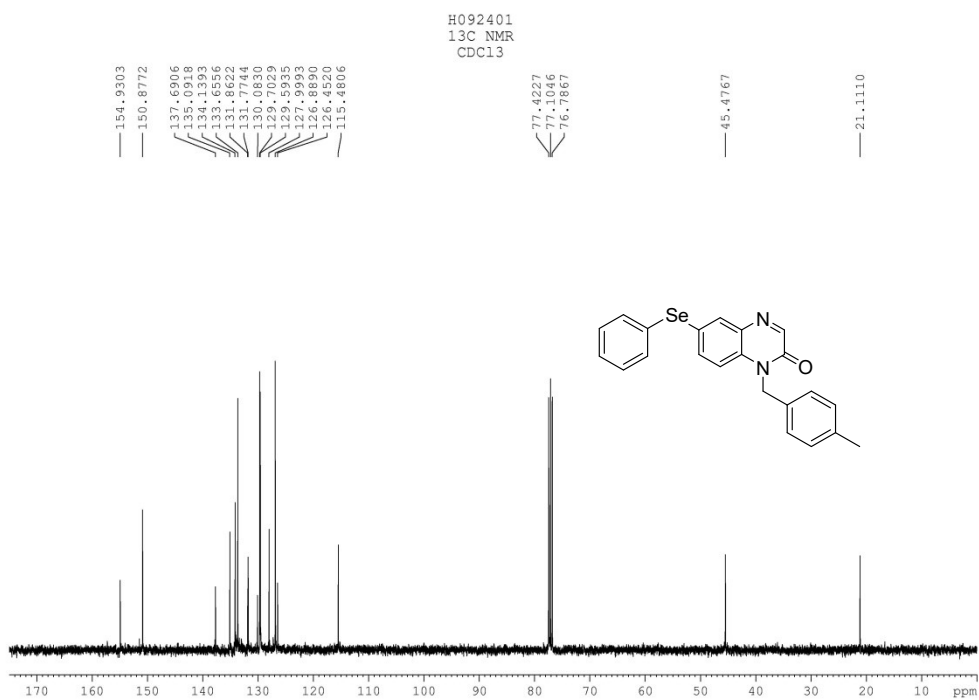

Fig. S33 <sup>13</sup>C NMR spectrum of compound 3p

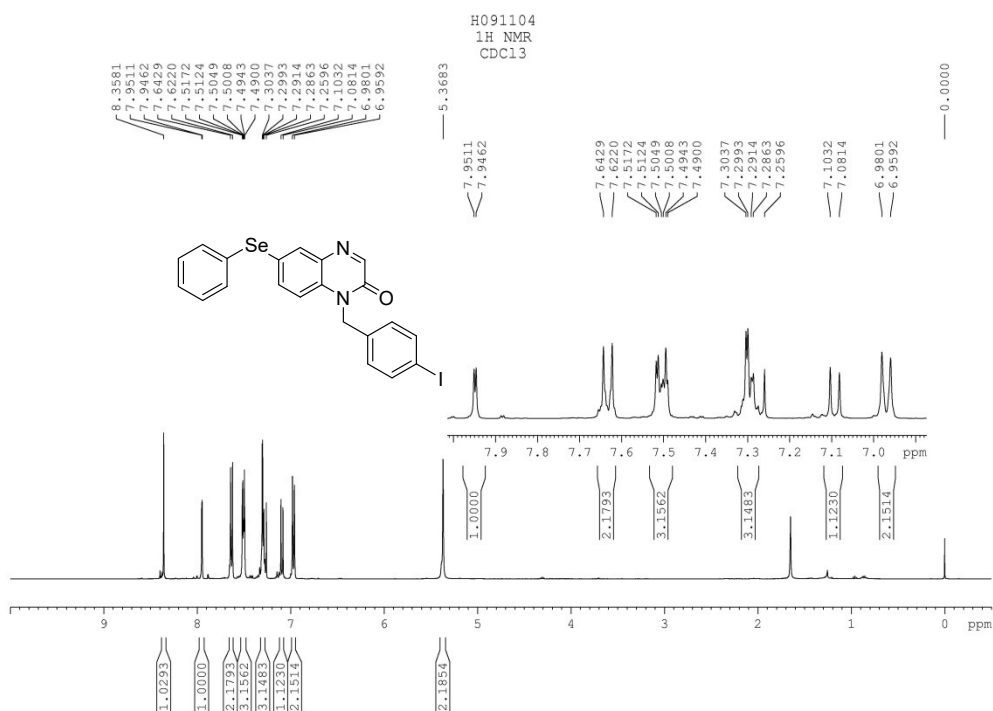

Fig. S34 <sup>1</sup>H NMR spectrum of compound 3q

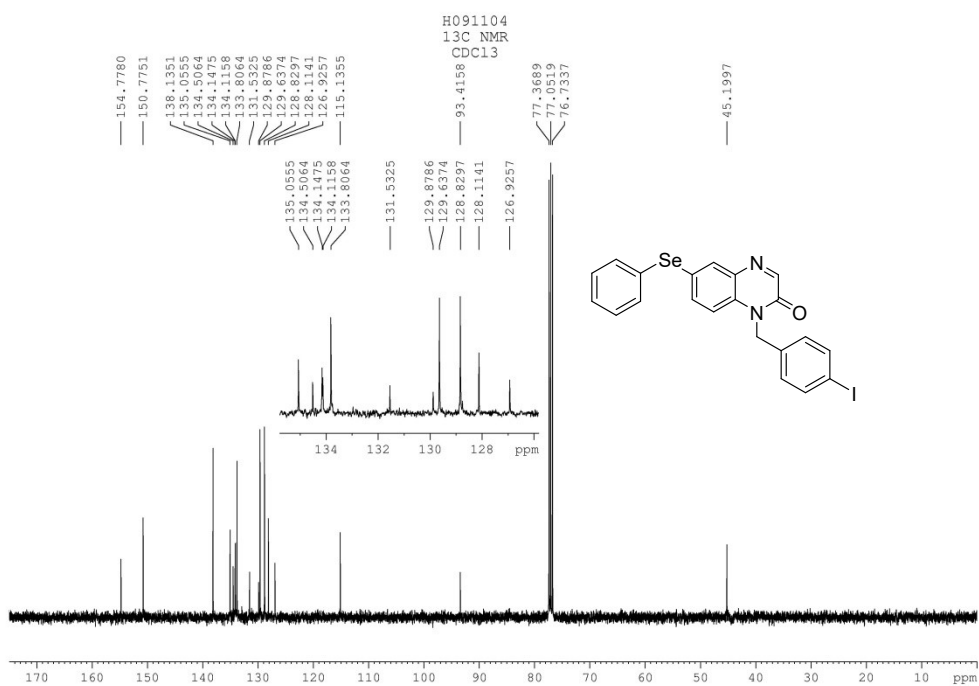

Fig. S35 <sup>13</sup>C NMR spectrum of compound 3q

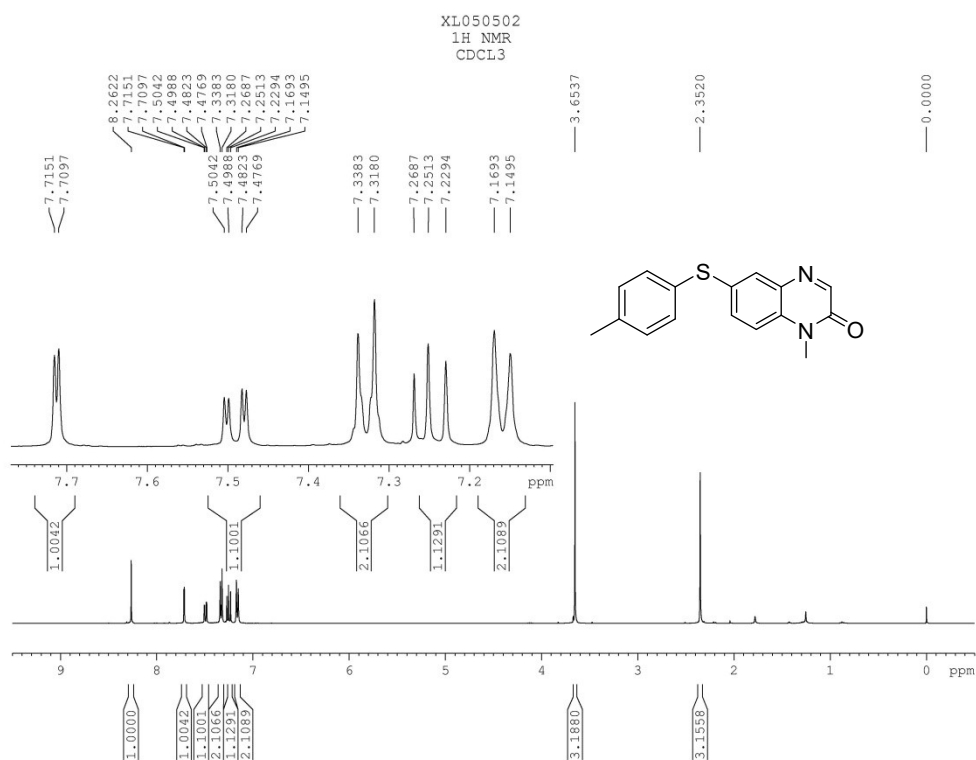

Fig. S36 <sup>1</sup>H NMR spectrum of compound 5a

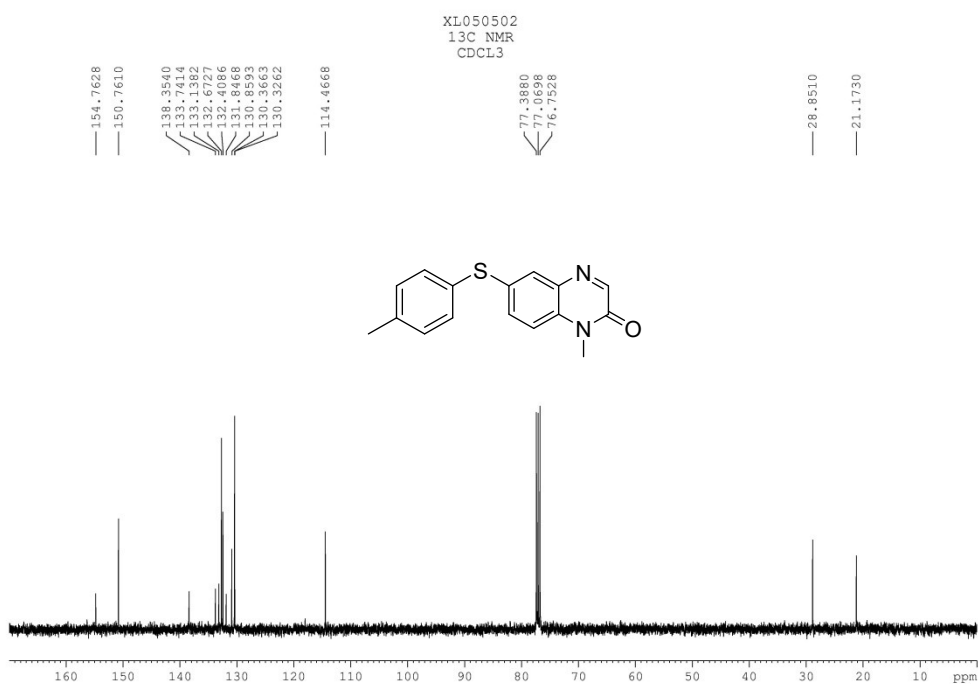

Fig. S37 <sup>13</sup>C NMR spectrum of compound 5a

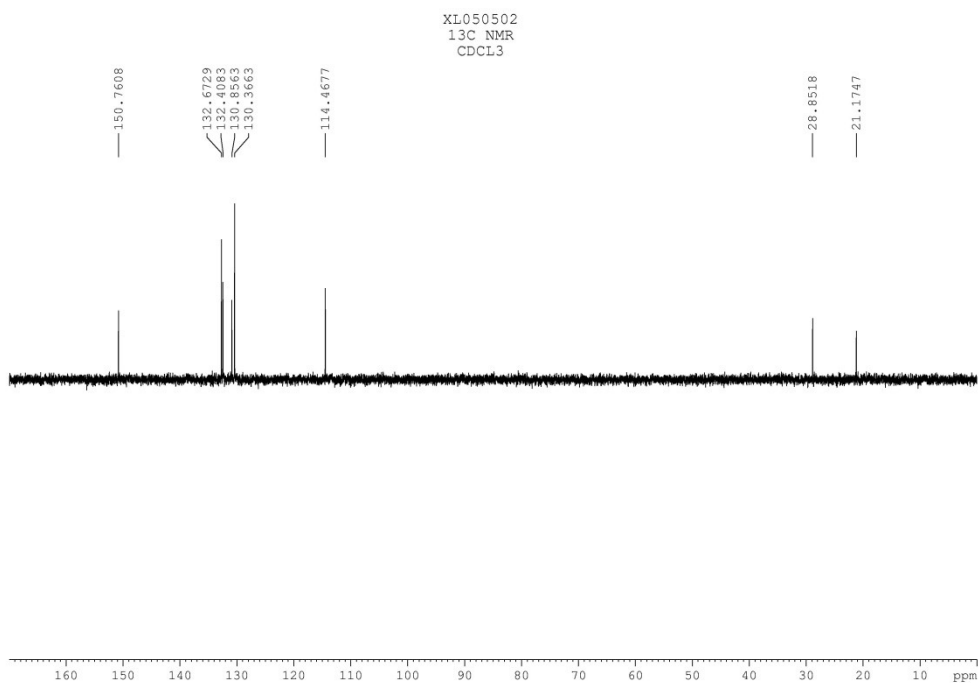

Fig. S38 DEPT135 spectrum of compound 5a

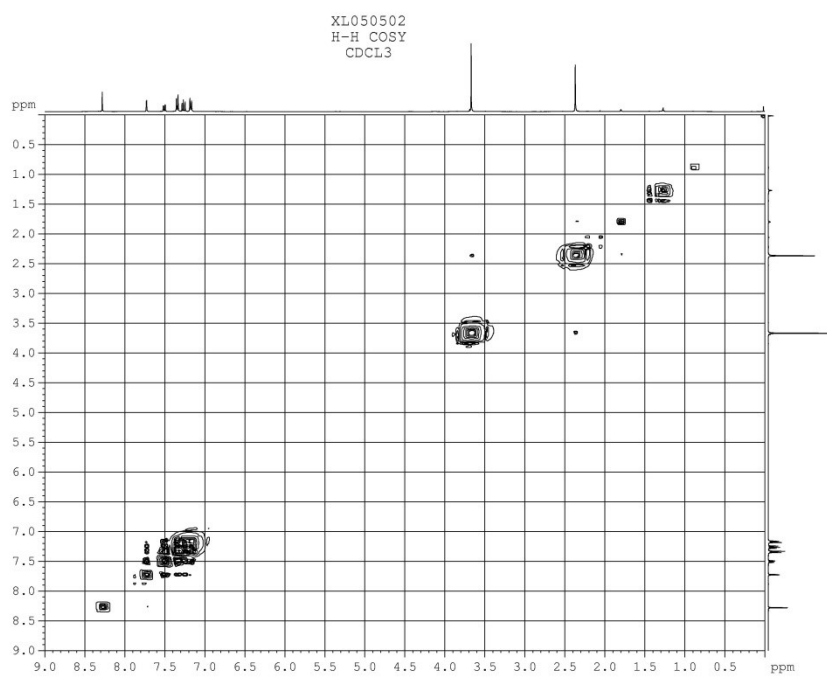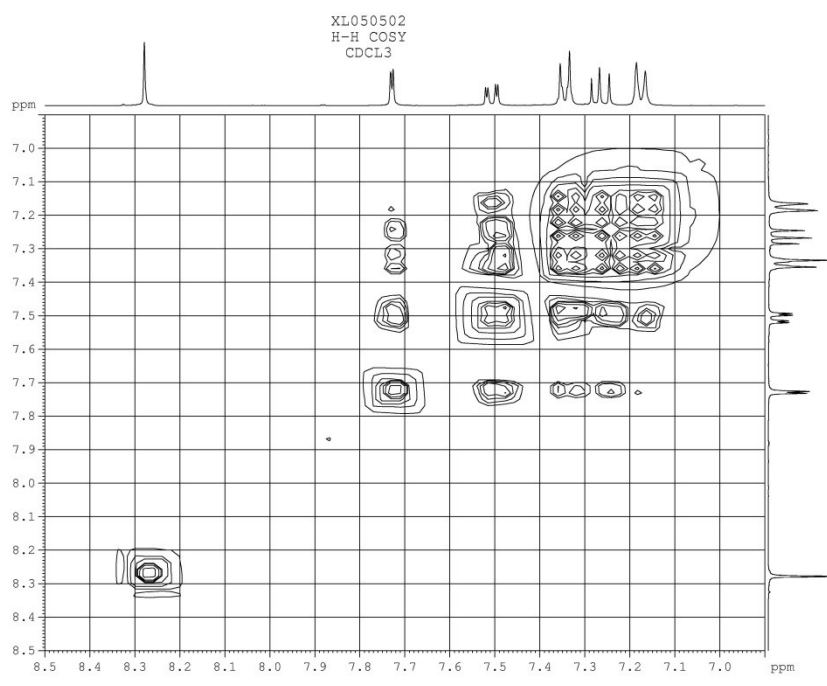

**Fig. S39** H-H COSY spectrum of compound **5a**

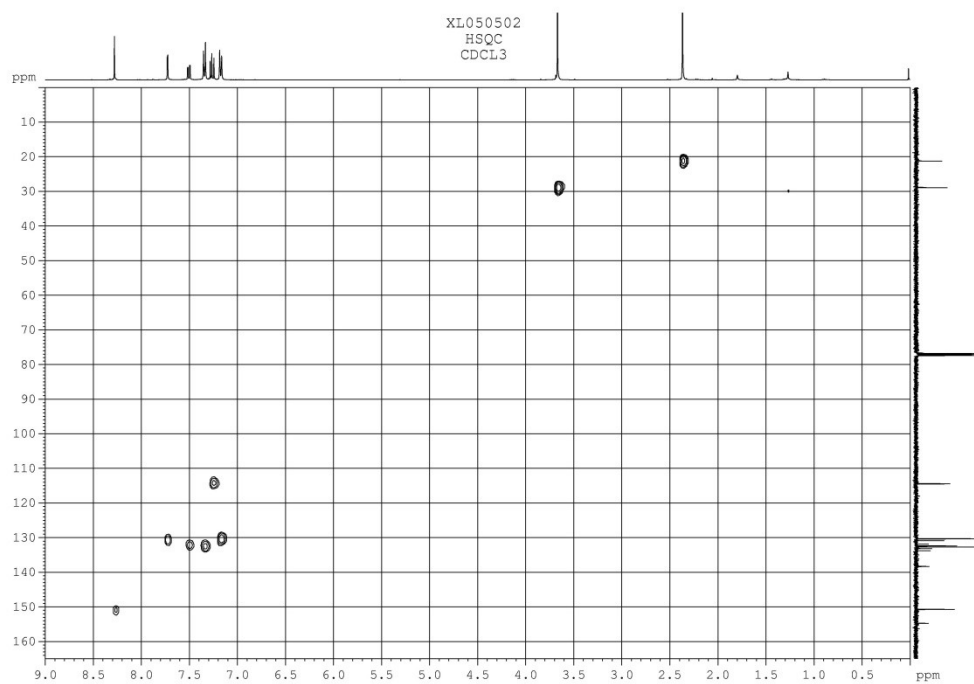

**Fig. S40** HSQC spectrum of compound **5a**

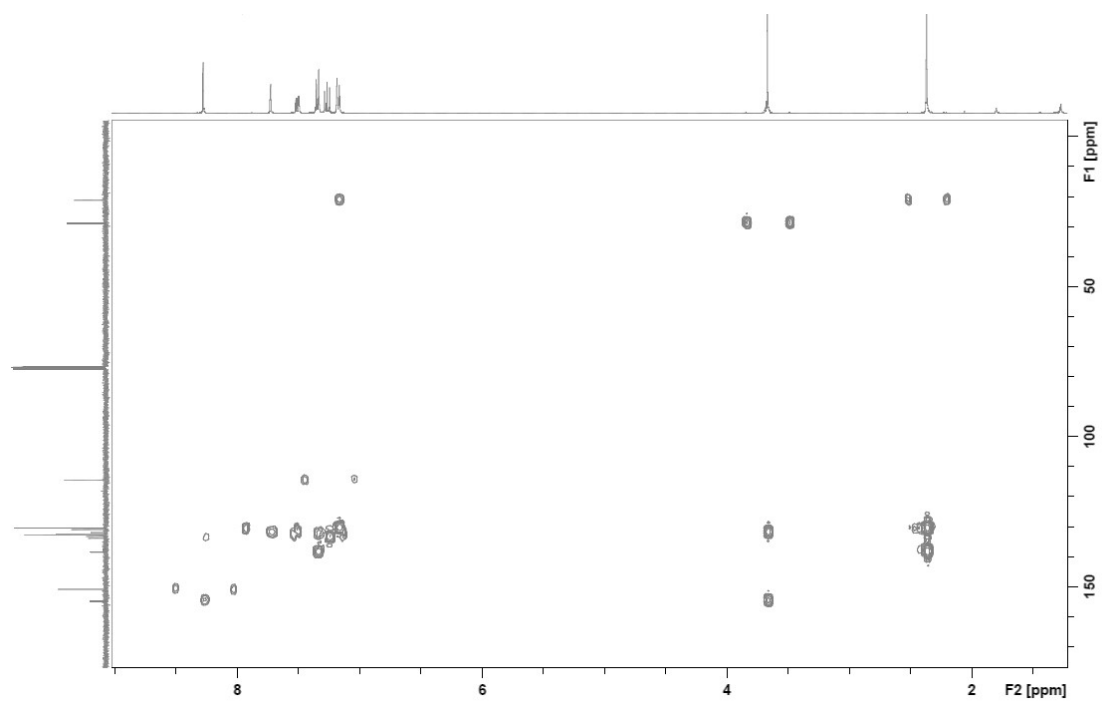

**Fig. S41** HMBC spectrum of compound **5a**

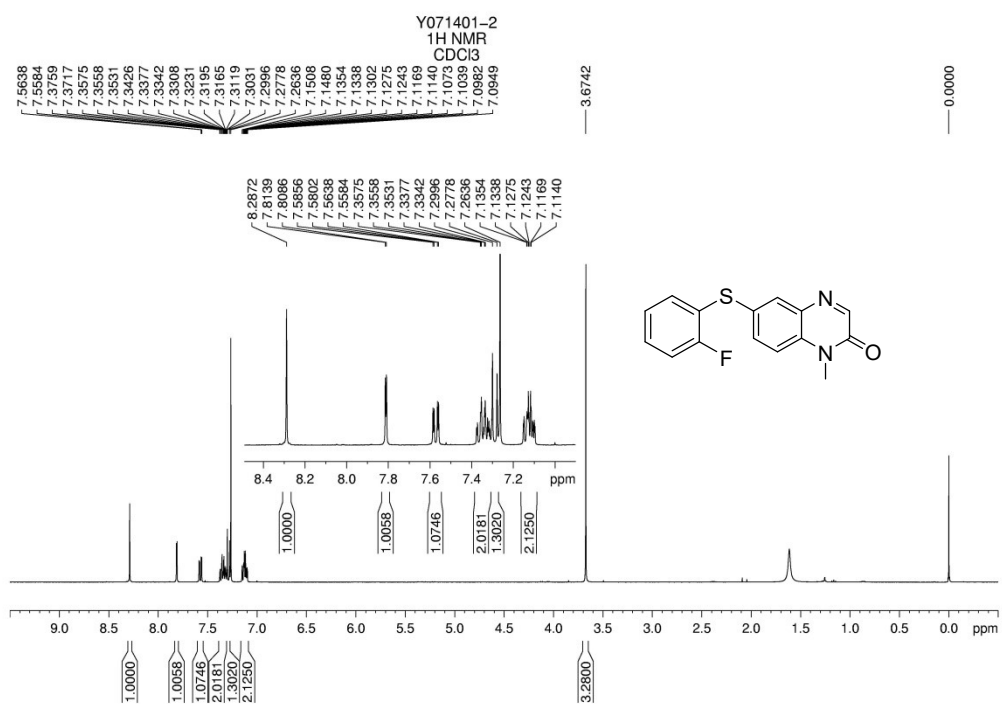

Fig. S42 <sup>1</sup>H NMR spectrum of compound 5b

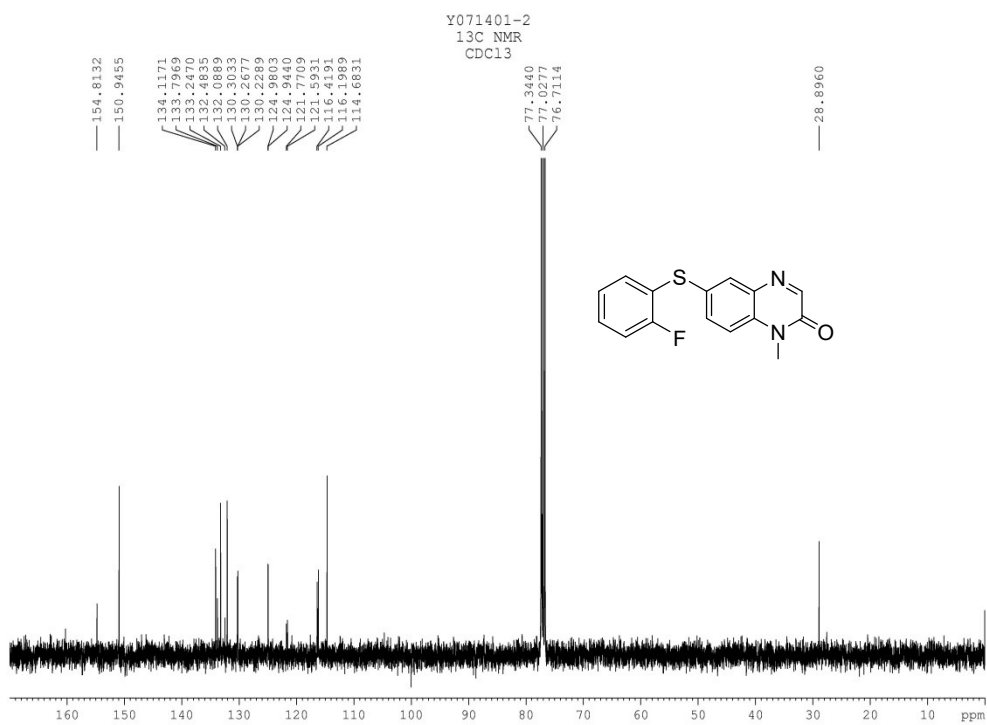

Fig. S43 <sup>13</sup>C NMR spectrum of compound 5b



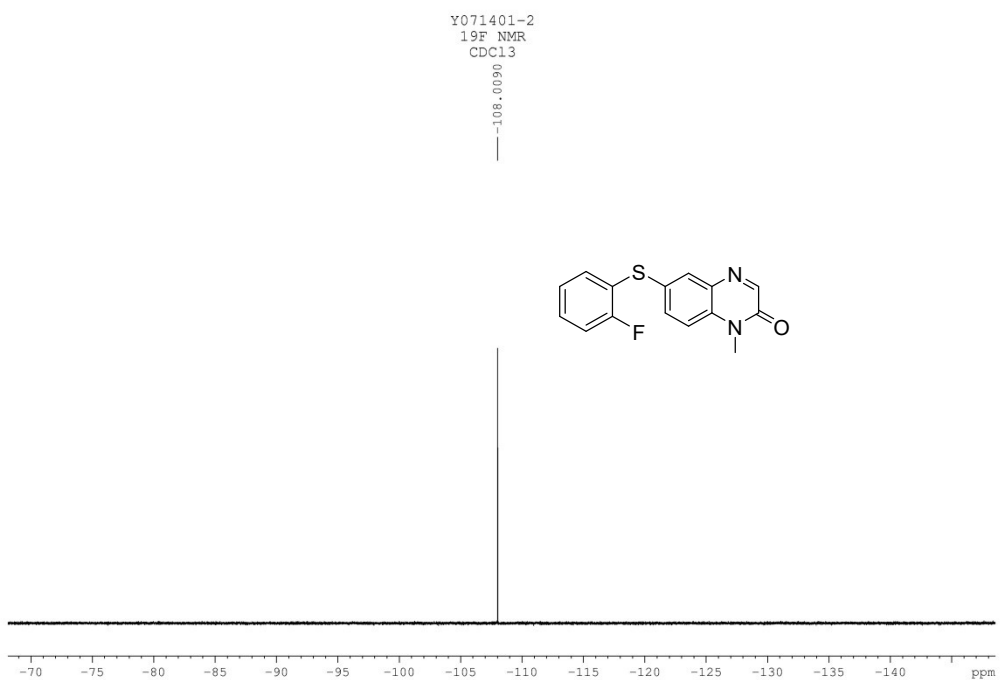

Fig. S44 <sup>19</sup>F NMR spectrum of compound 5b

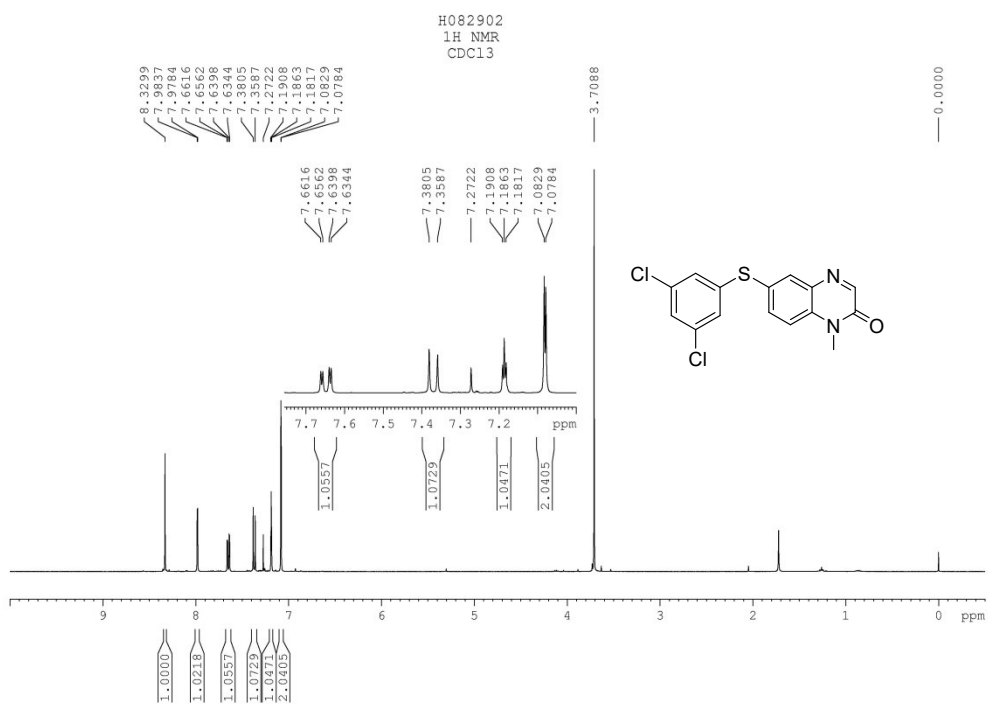

Fig. S45 <sup>1</sup>H NMR spectrum of compound 5c

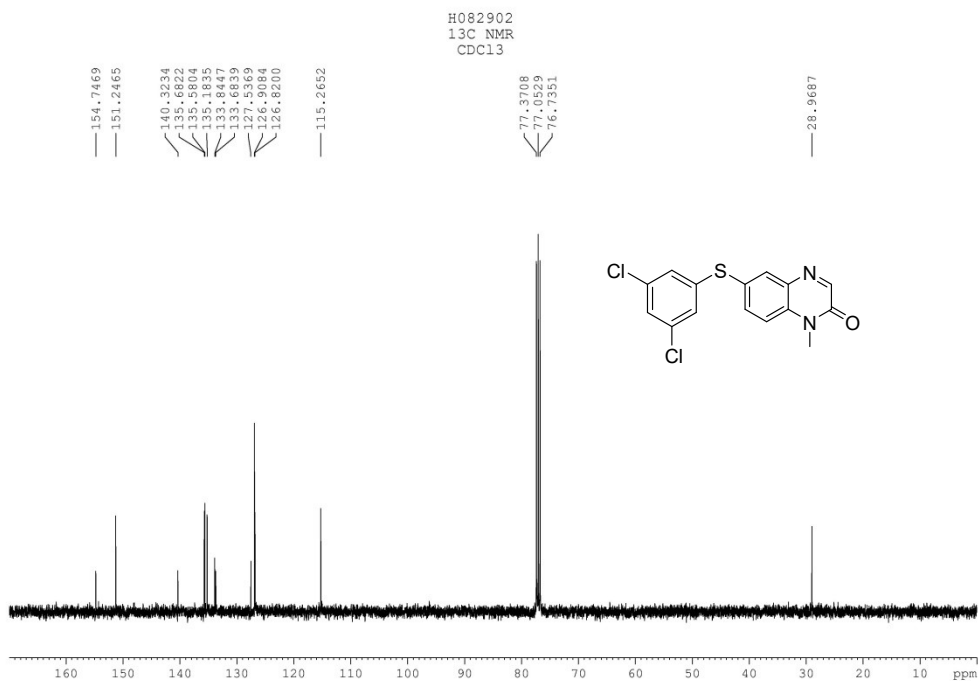

Fig. S46 <sup>13</sup>C NMR spectrum of compound 5c

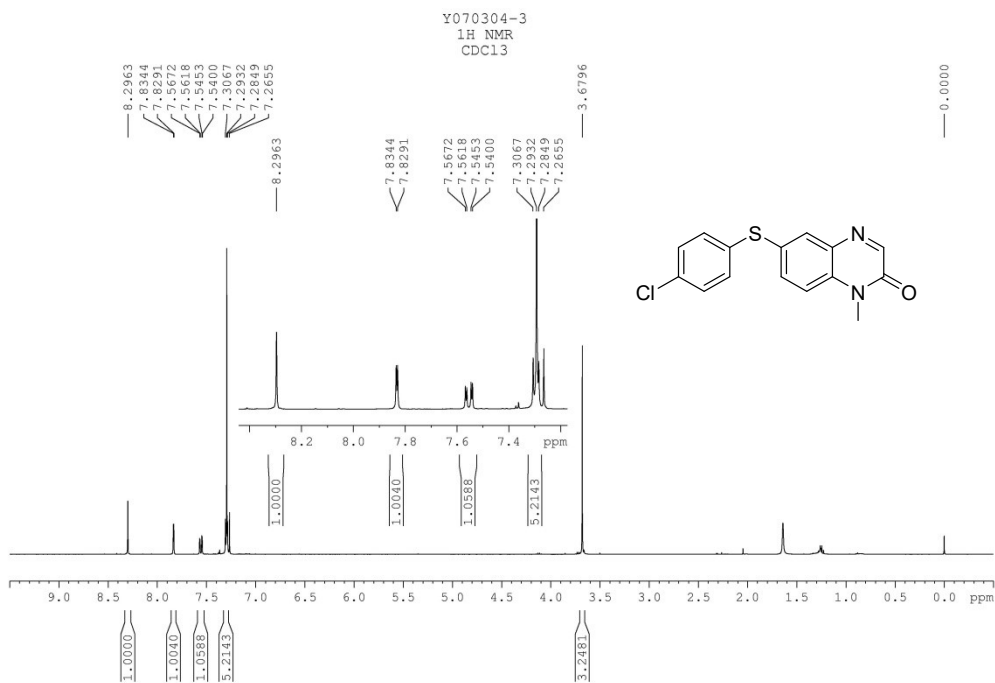

Fig. S47 <sup>1</sup>H NMR spectrum of compound 5d

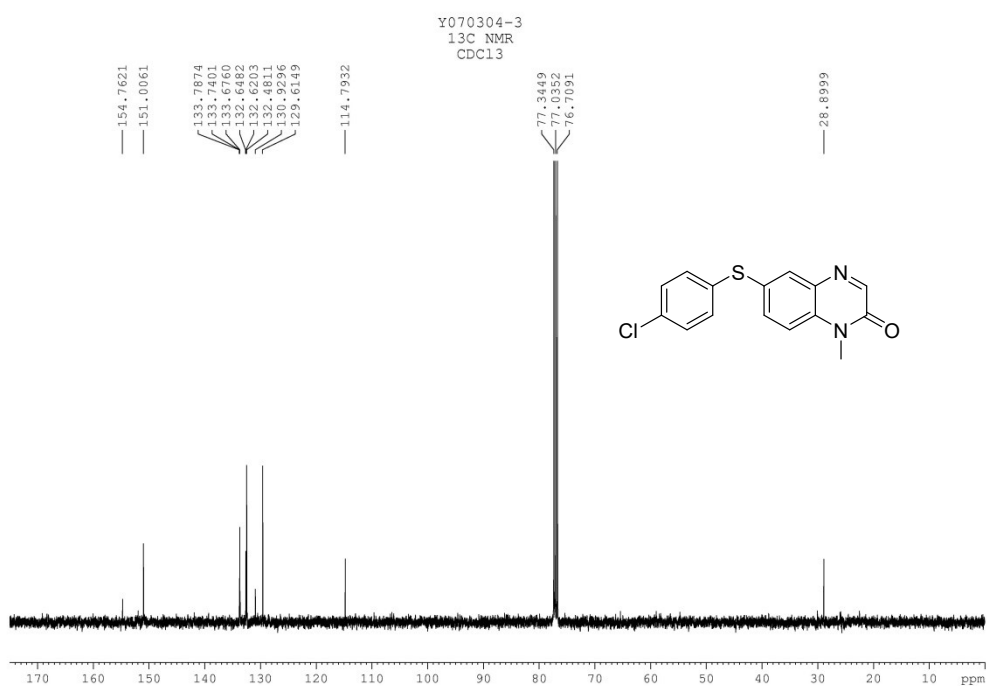

Fig. S48 <sup>13</sup>C NMR spectrum of compound 5d

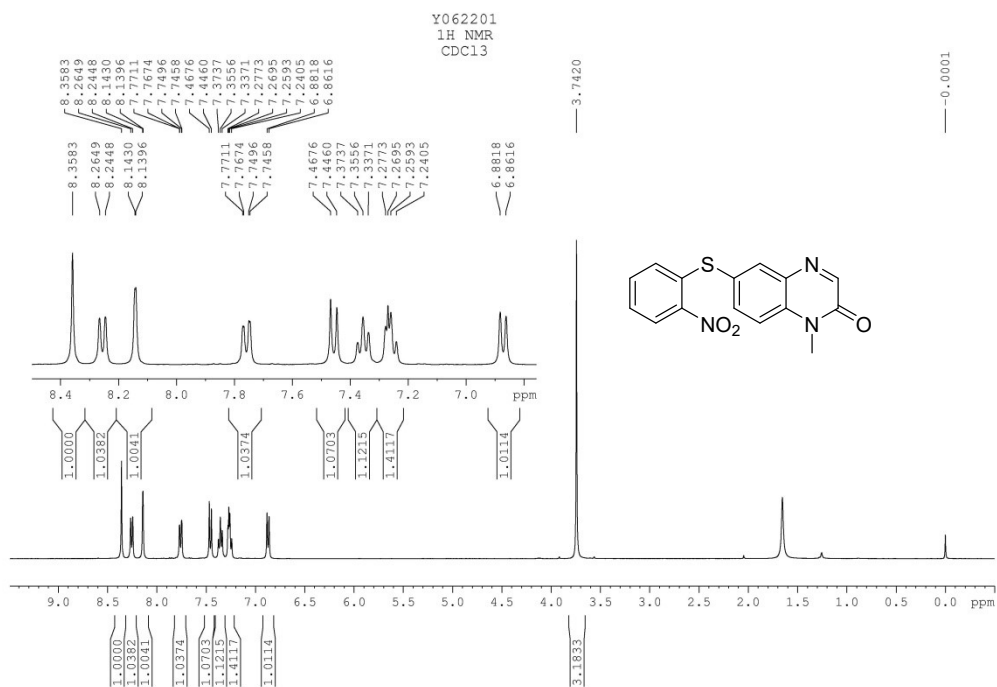

Fig. S49 <sup>1</sup>H NMR spectrum of compound 5e

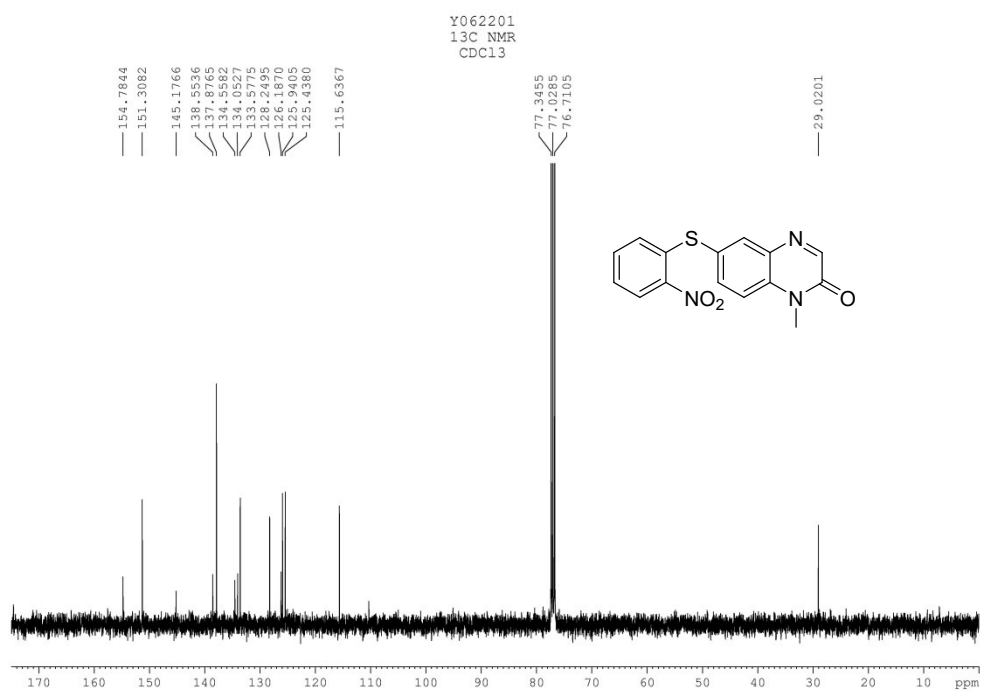

Fig. S50 <sup>13</sup>C NMR spectrum of compound 5e

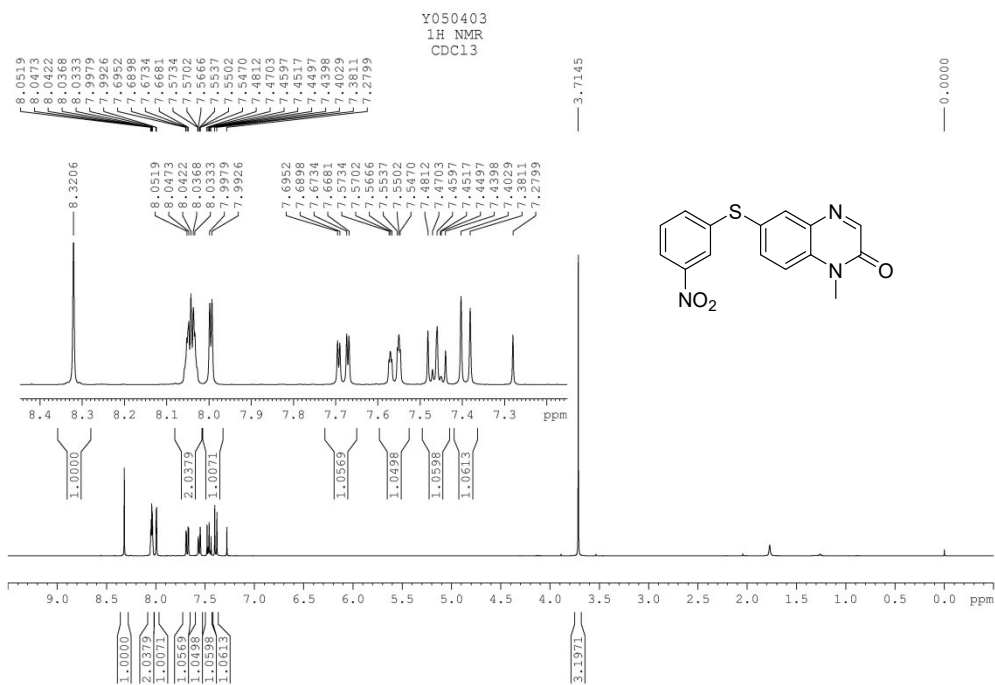

Fig. S51 <sup>1</sup>H NMR spectrum of compound 5f

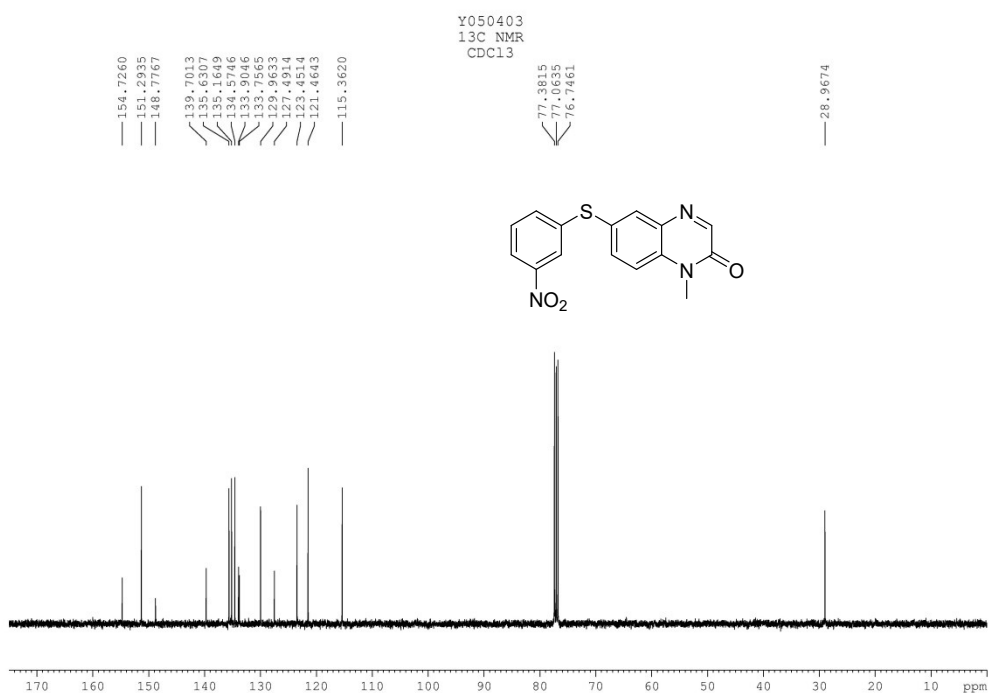

Fig. S52 <sup>13</sup>C NMR spectrum of compound 5f

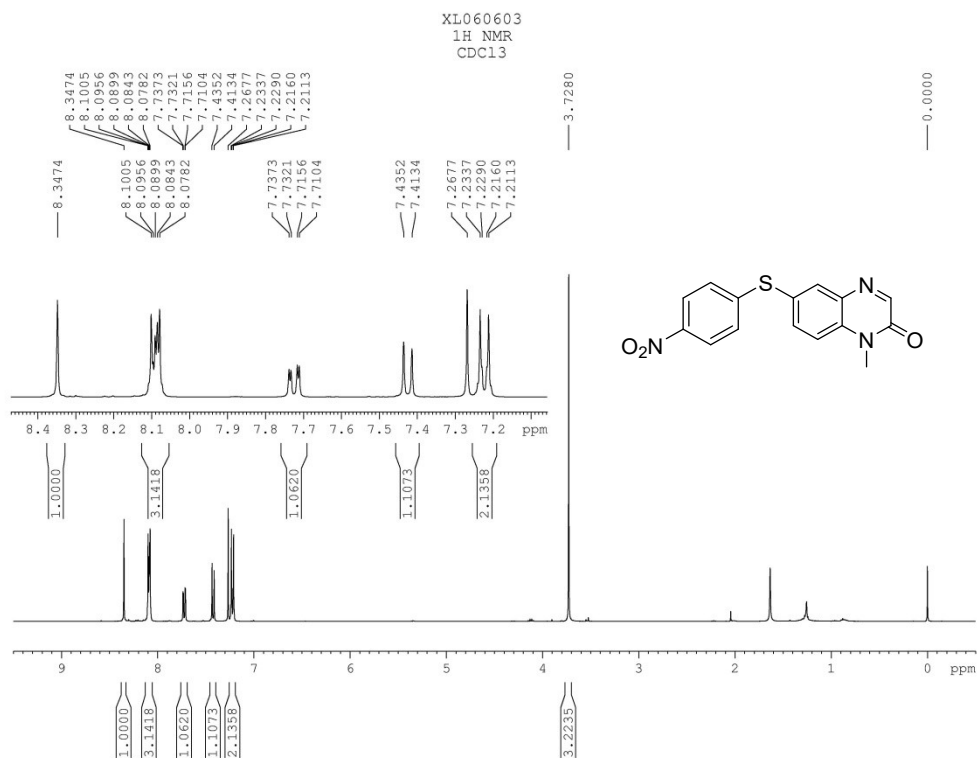

Fig. S53 <sup>1</sup>H NMR spectrum of compound 5g

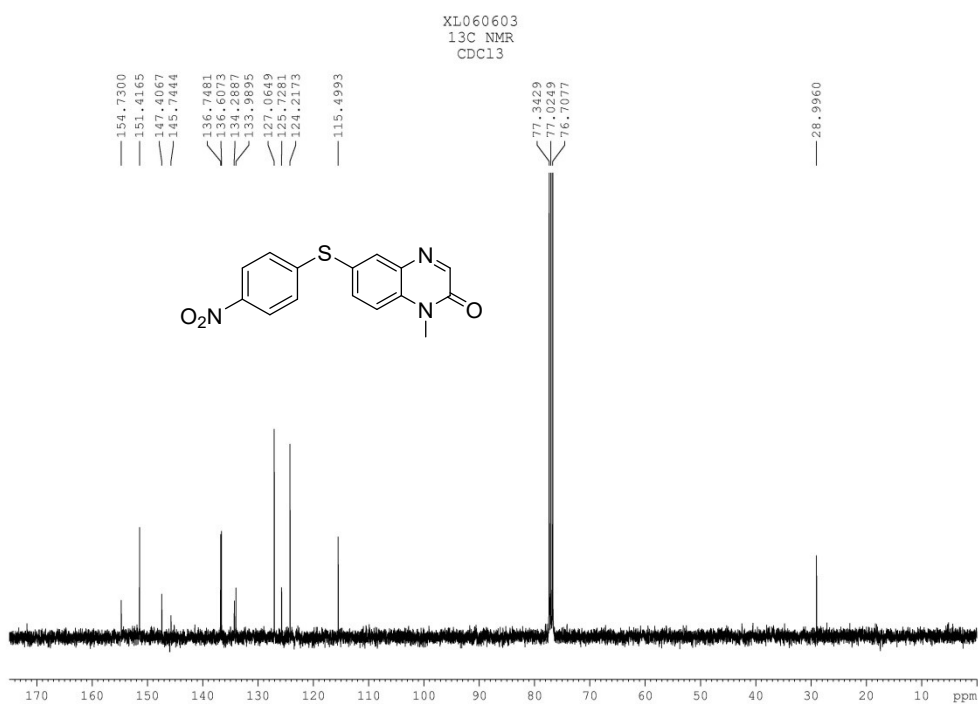

Fig. S54 <sup>13</sup>C NMR spectrum of compound 5g

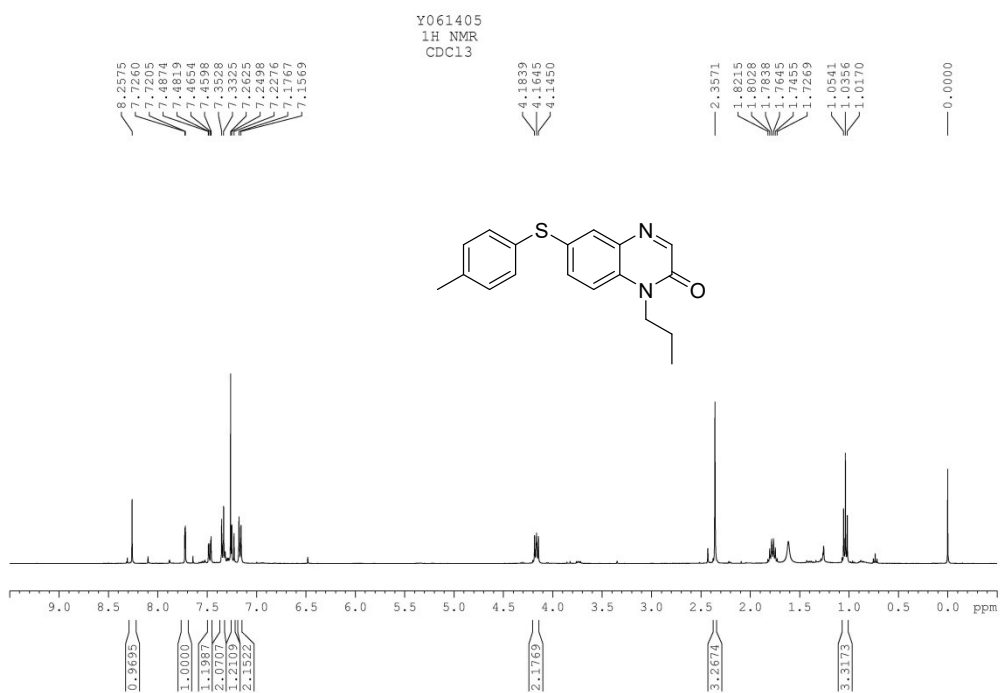

Fig. S55 <sup>1</sup>H NMR spectrum of compound 5h

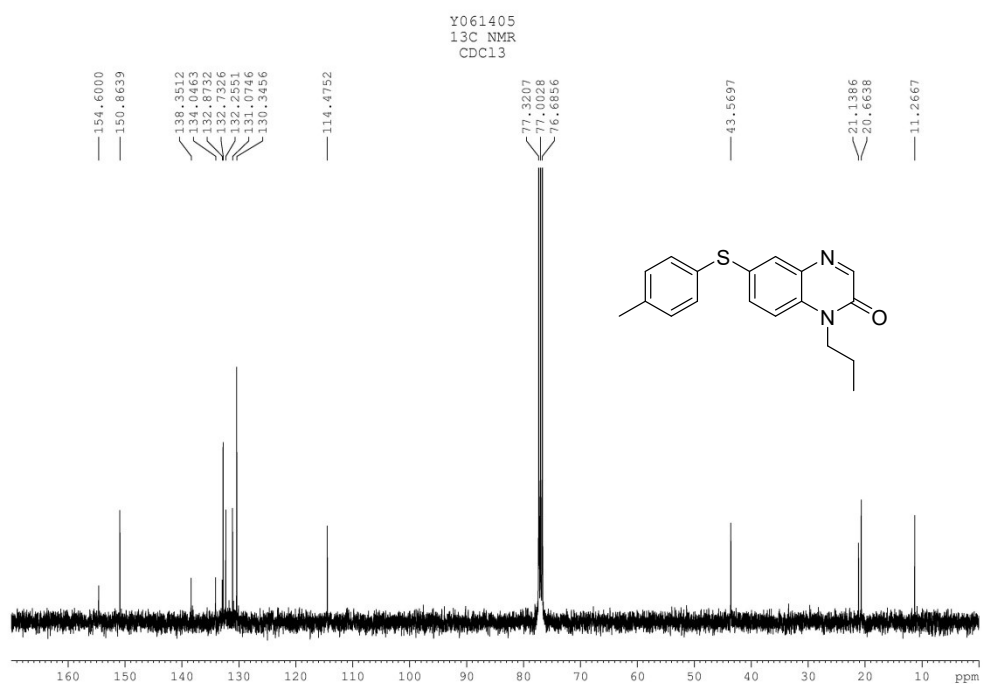

Fig. S6 <sup>13</sup>C NMR spectrum of compound 5h

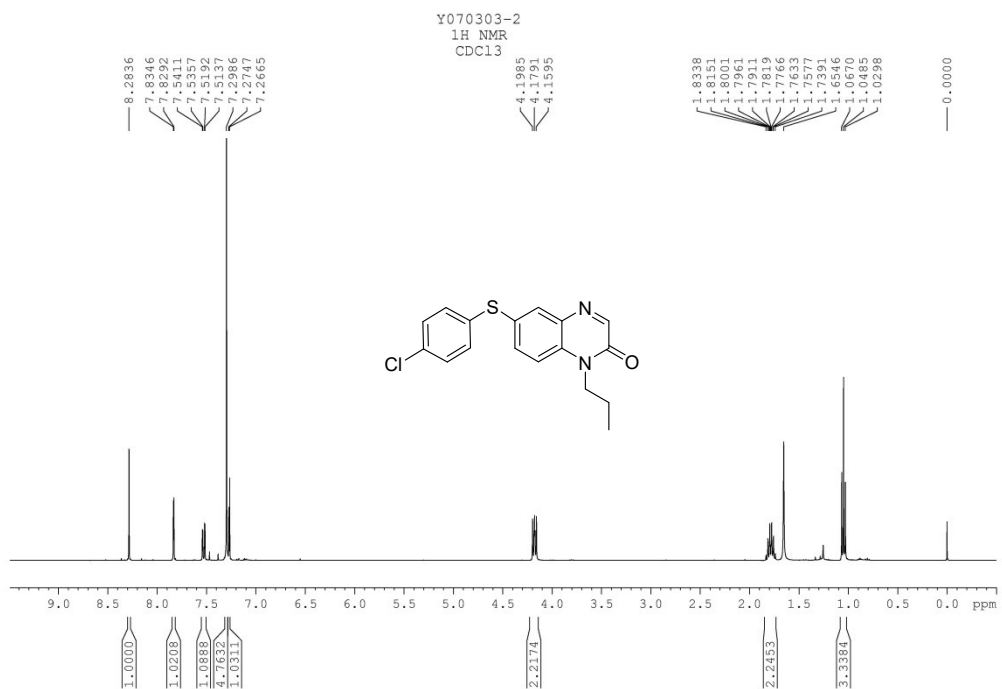

Fig. S57 <sup>1</sup>H NMR spectrum of compound 5i

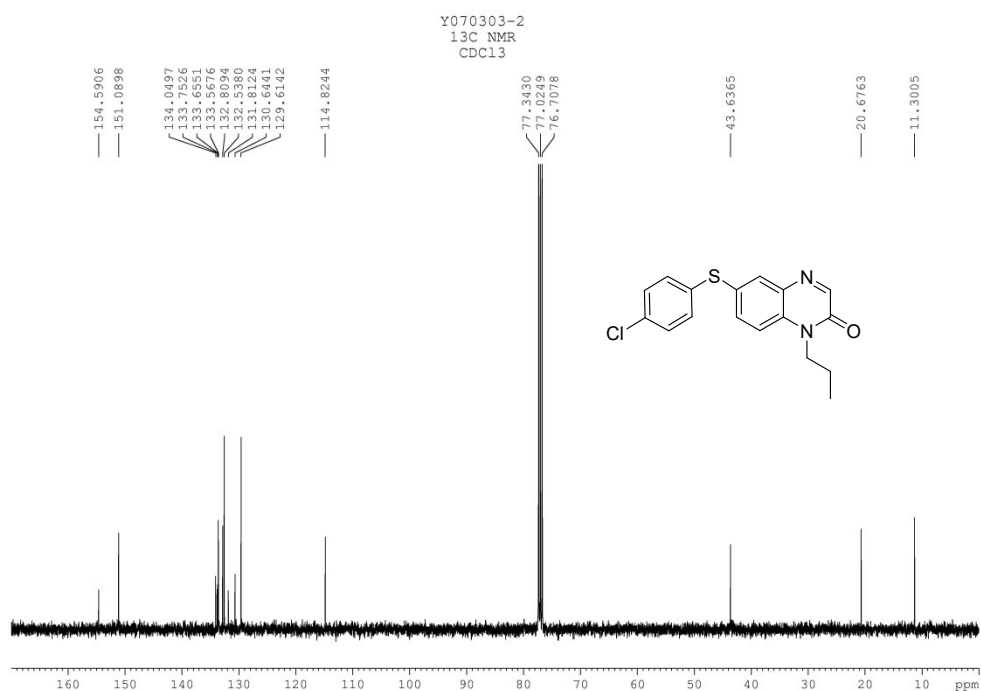

Fig. S58 <sup>13</sup>C NMR spectrum of compound 5i

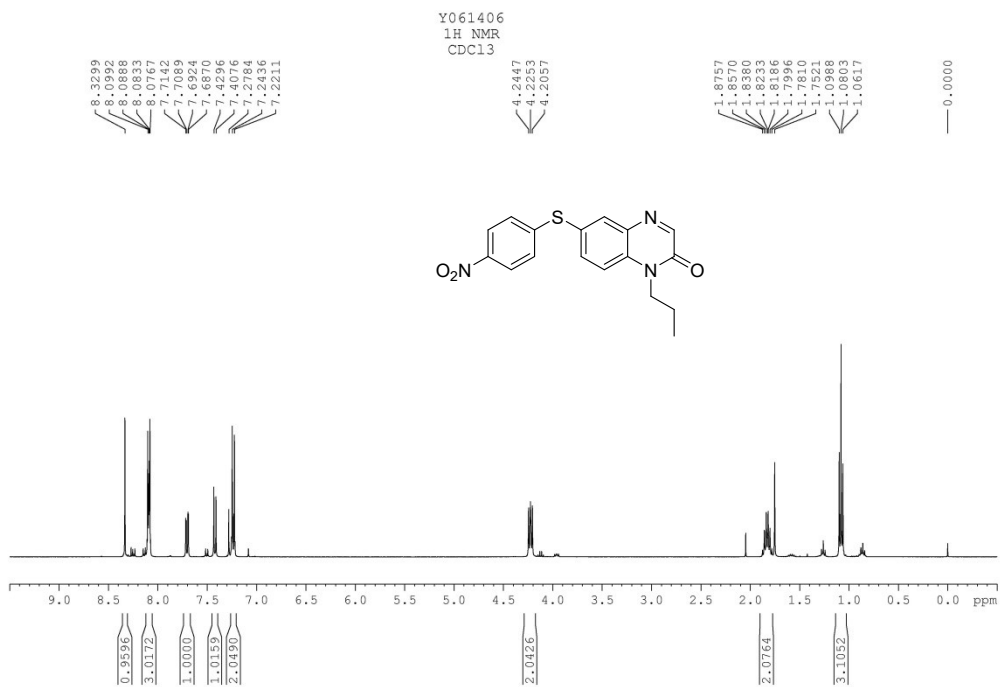

Fig. S59 <sup>1</sup>H NMR spectrum of compound 5j



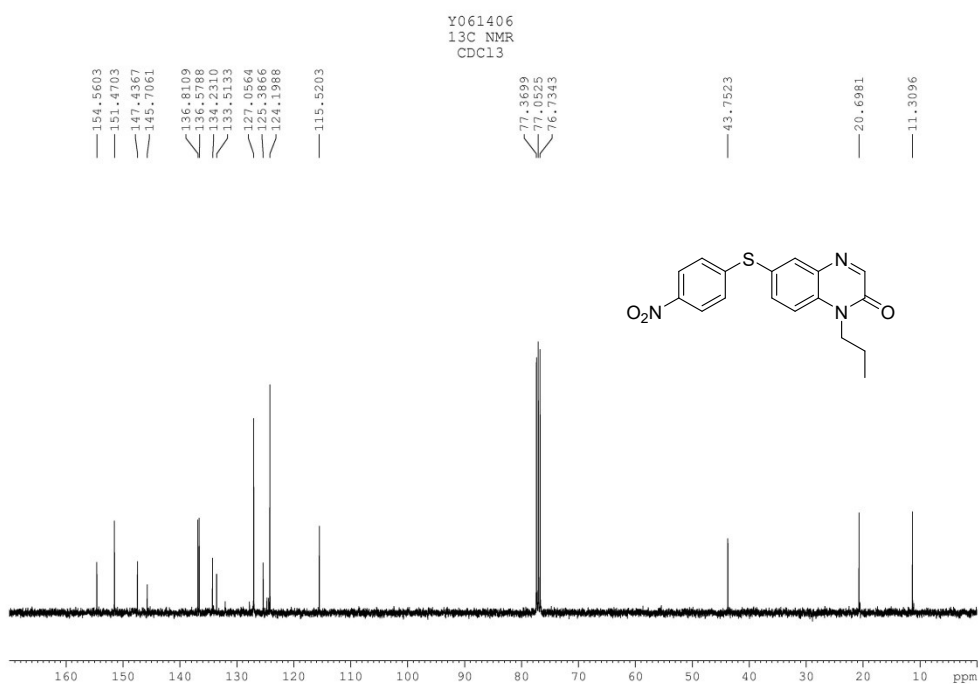

Fig. S60 <sup>13</sup>C NMR spectrum of compound 5j

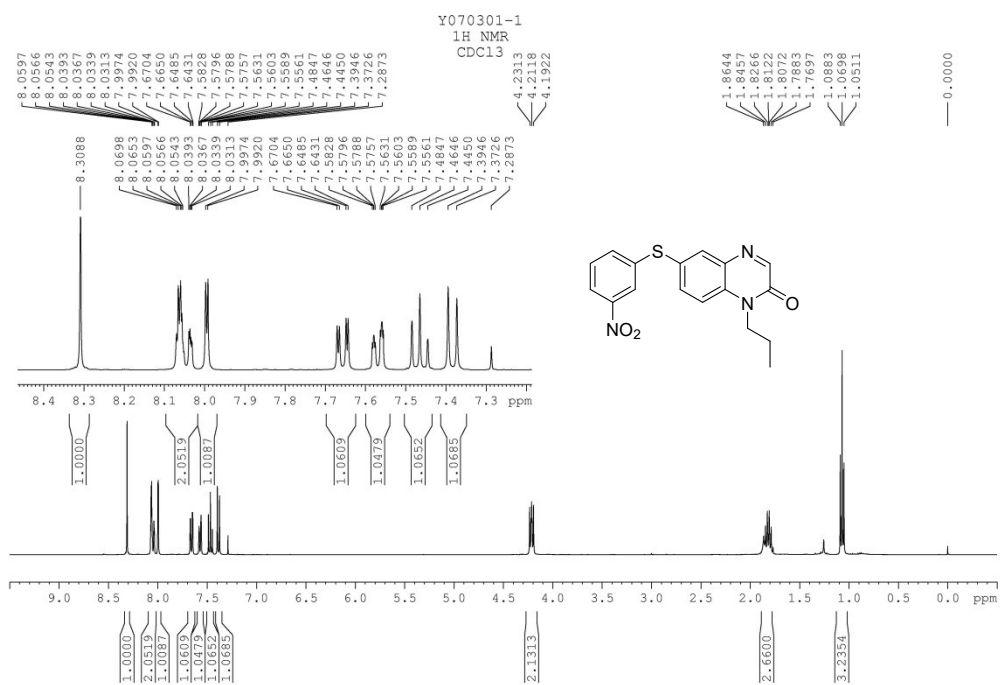

Fig. S61 <sup>1</sup>H NMR spectrum of compound 5k

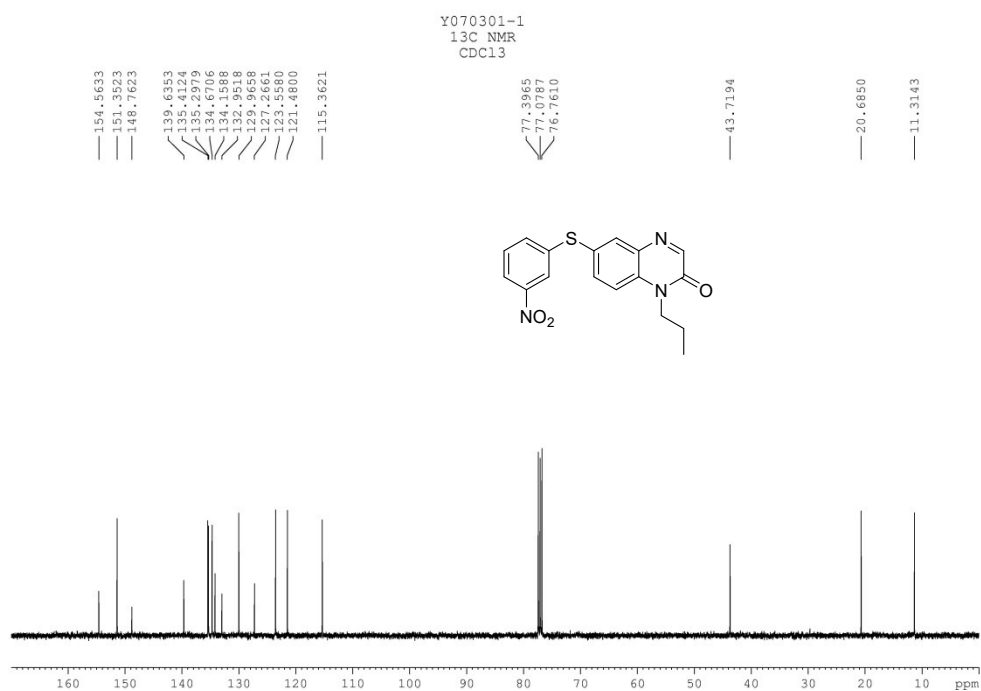

Fig. S62 <sup>13</sup>C NMR spectrum of compound 5k

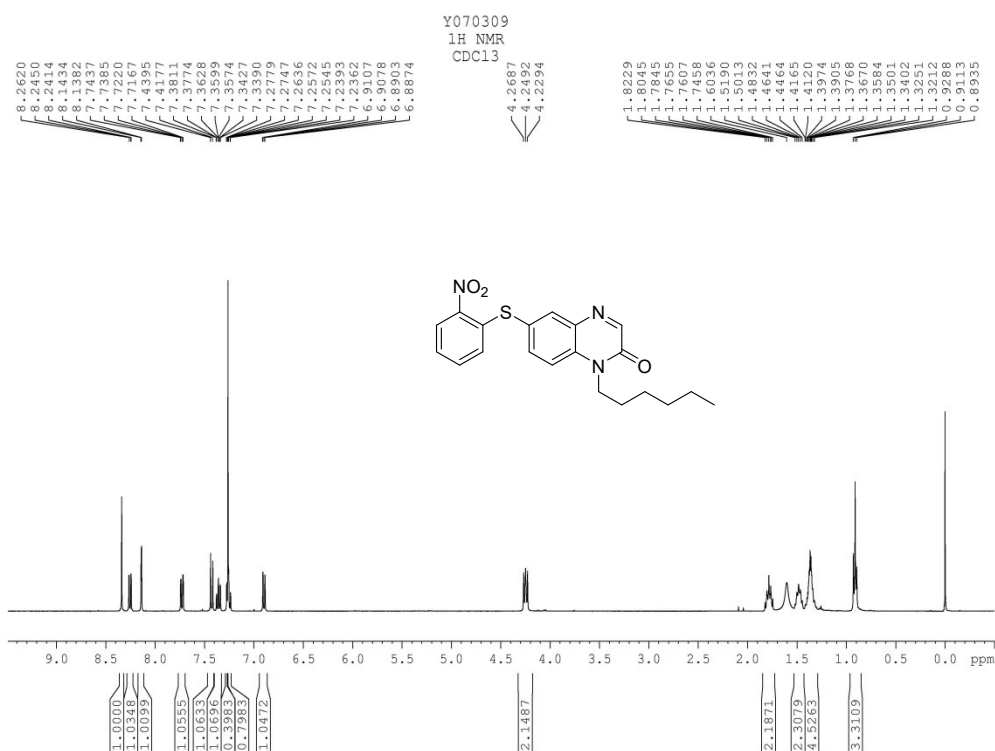

Fig. S63 <sup>1</sup>H NMR spectrum of compound 5l

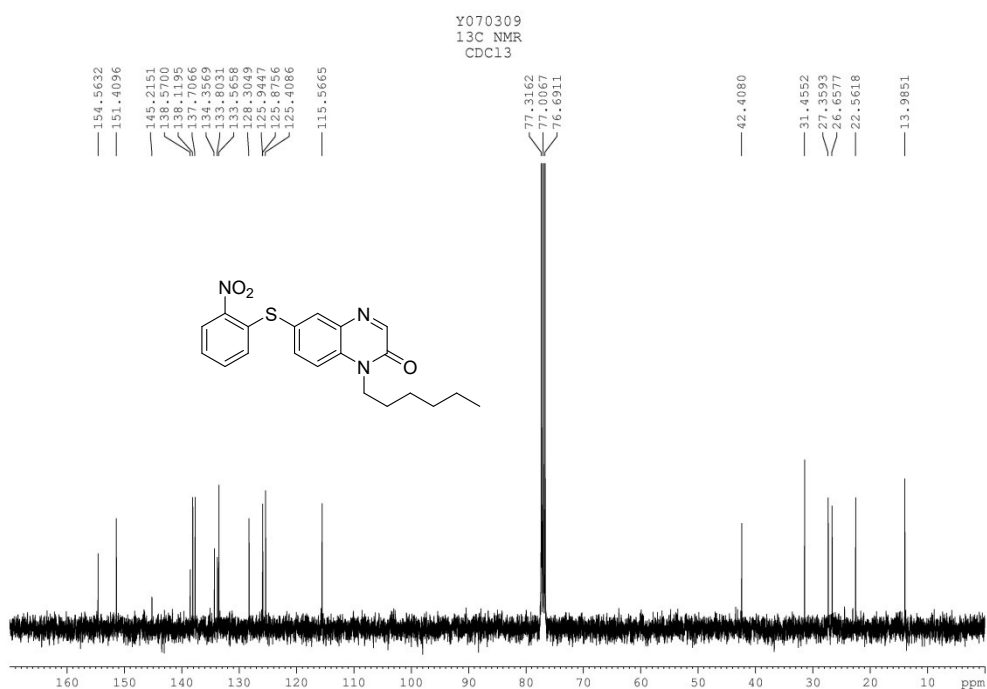

Fig. S64 <sup>13</sup>C NMR spectrum of compound 5l

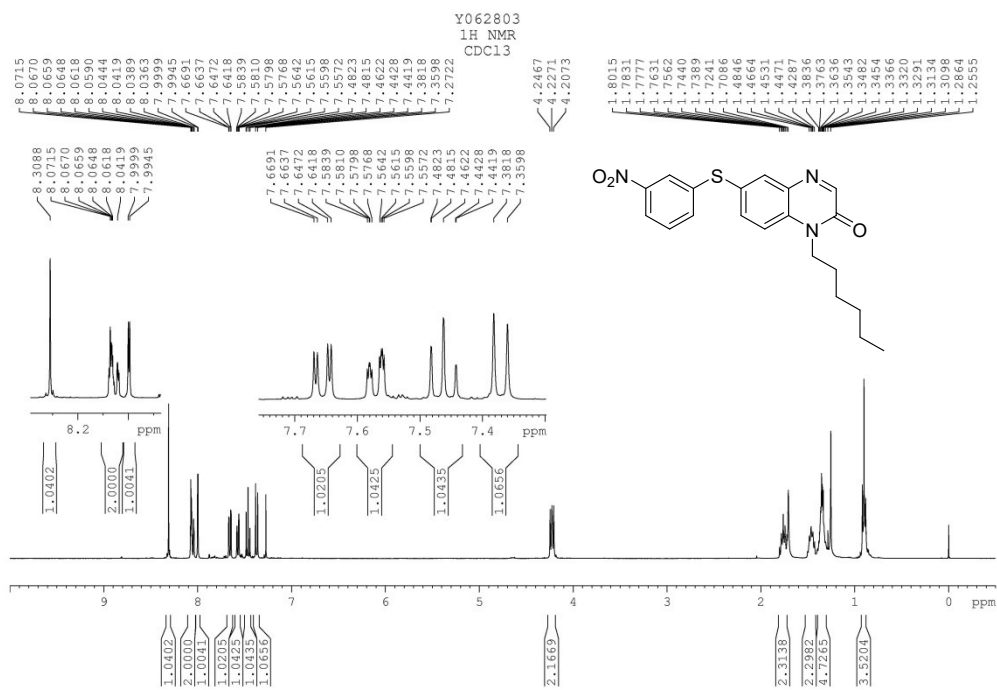

Fig. S65 <sup>1</sup>H NMR spectrum of compound 5m

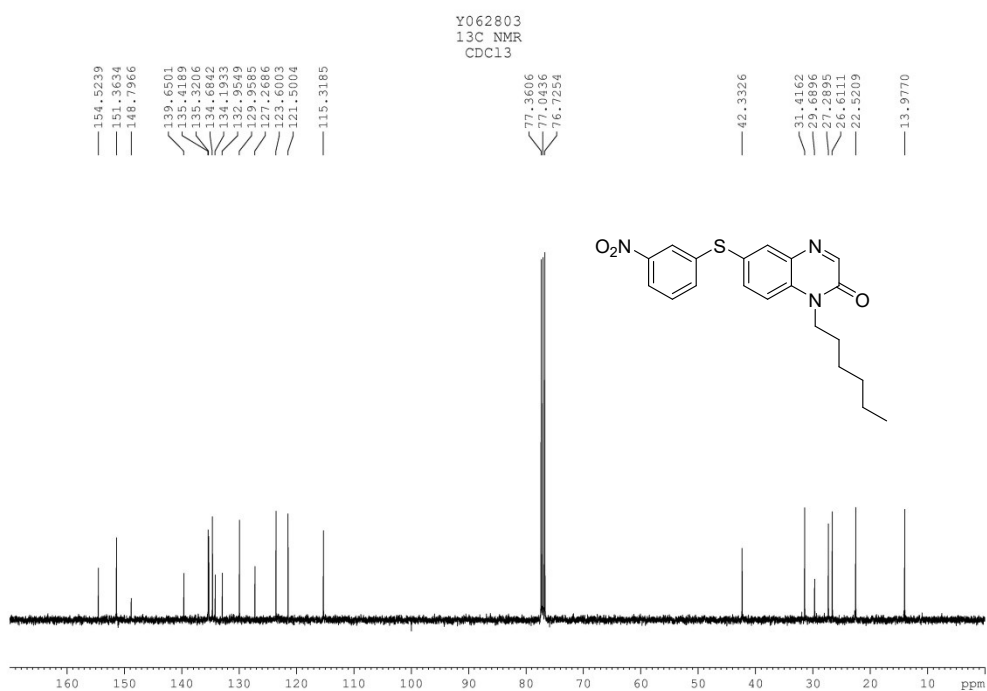

Fig. S66 <sup>13</sup>C NMR spectrum of compound 5m

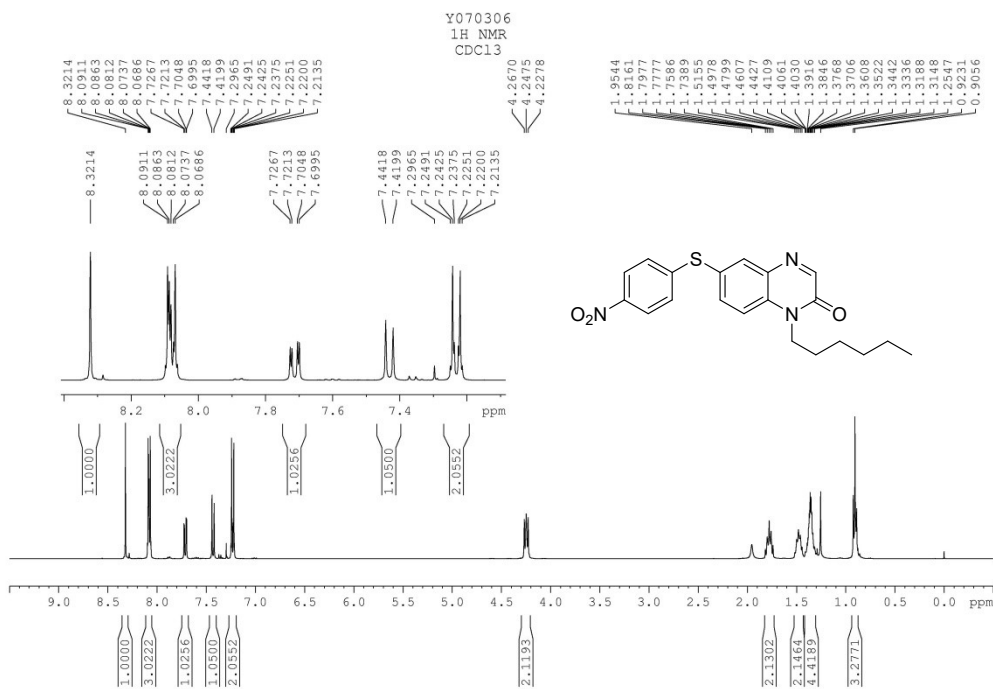

Fig. S67 <sup>1</sup>H NMR spectrum of compound 5m

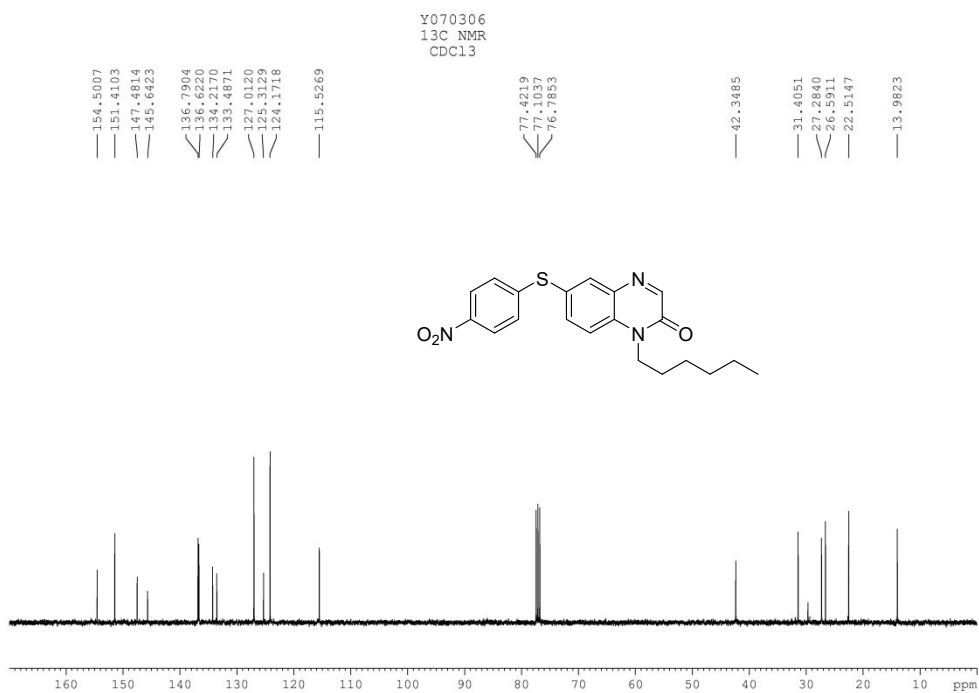

Fig. S68 <sup>13</sup>C NMR spectrum of compound 5n

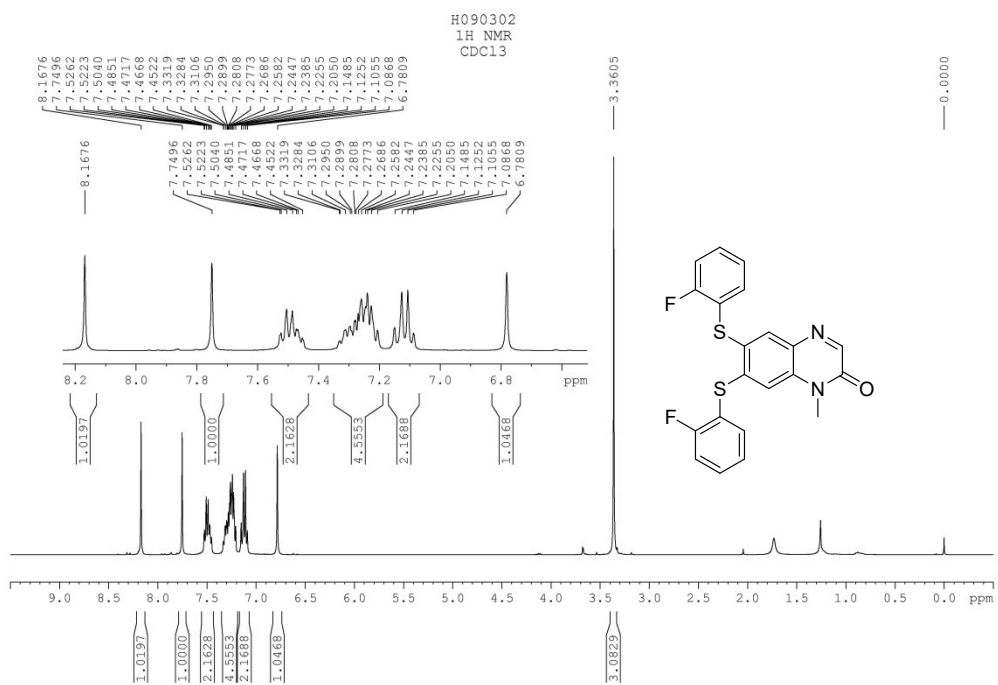

Fig. S69 <sup>1</sup>H NMR spectrum of compound 6a

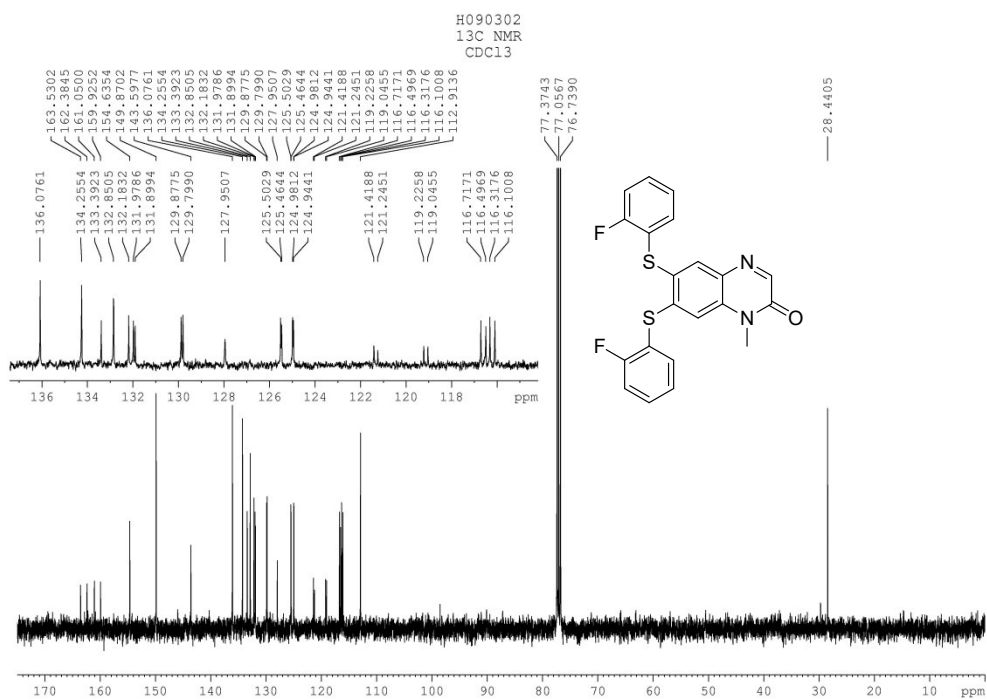

Fig. S70 <sup>13</sup>C NMR spectrum of compound 6a

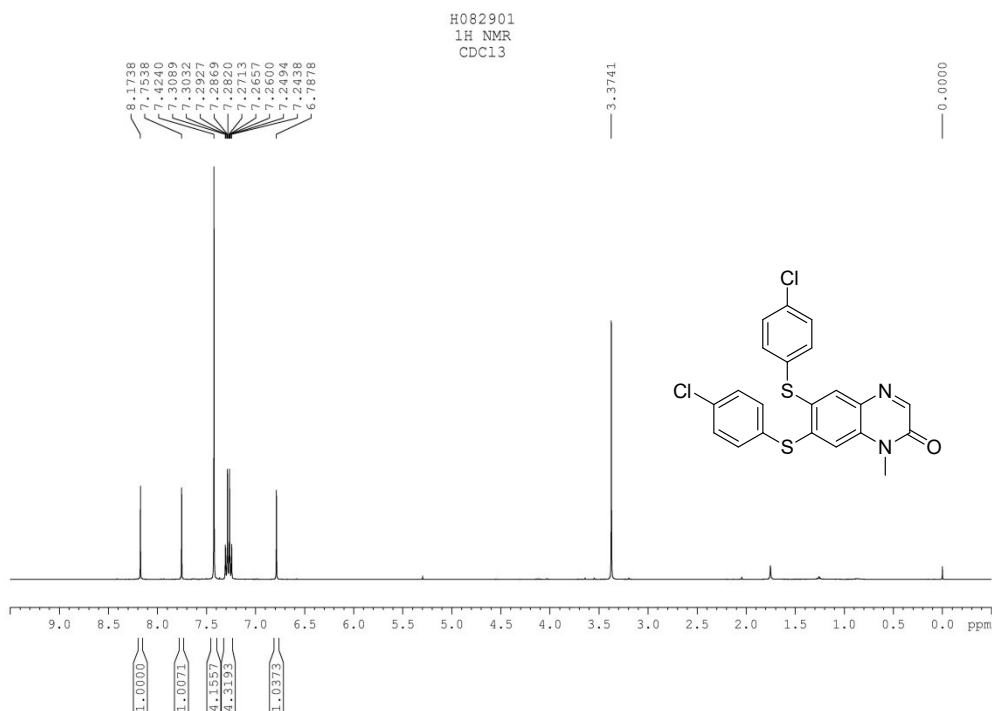

Fig. S71 <sup>1</sup>H NMR spectrum of compound 6b

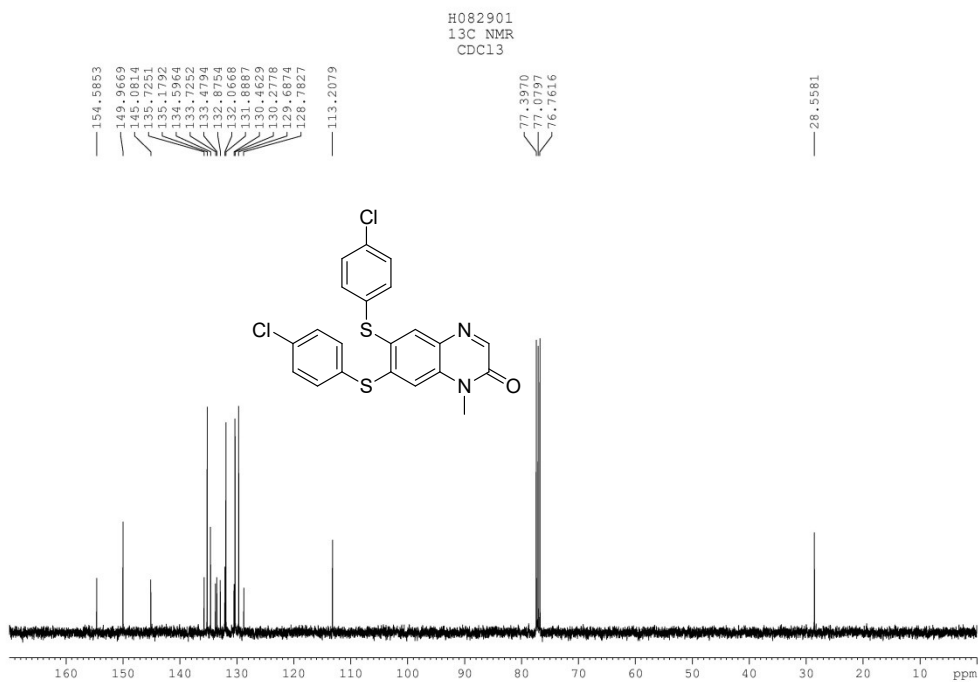

Fig. S72 <sup>13</sup>C NMR spectrum of compound 6b

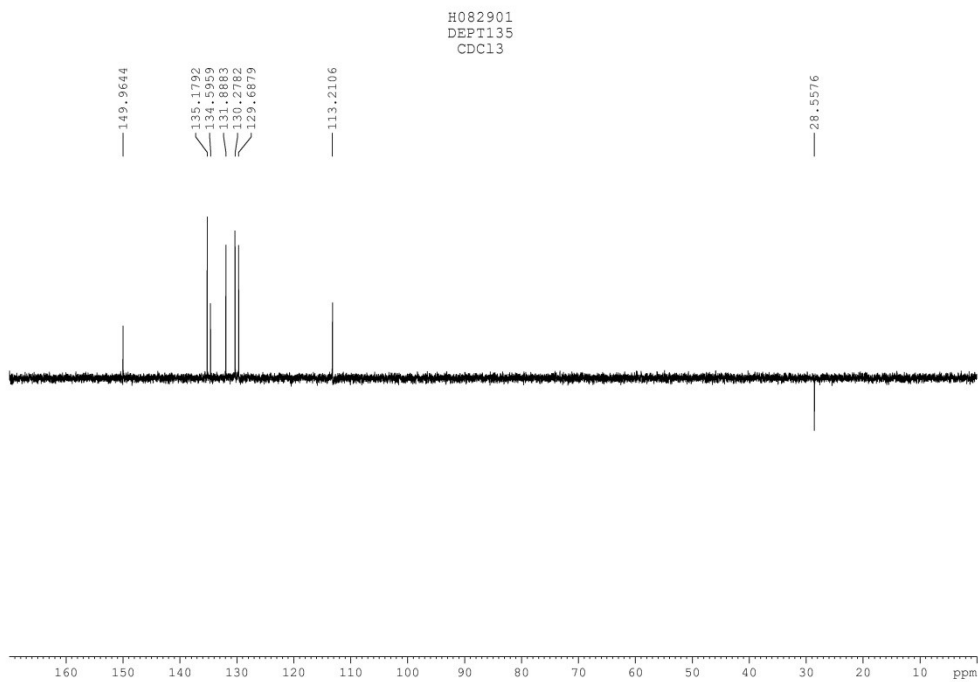

Fig. S73 DEPT135 spectrum of compound 6b





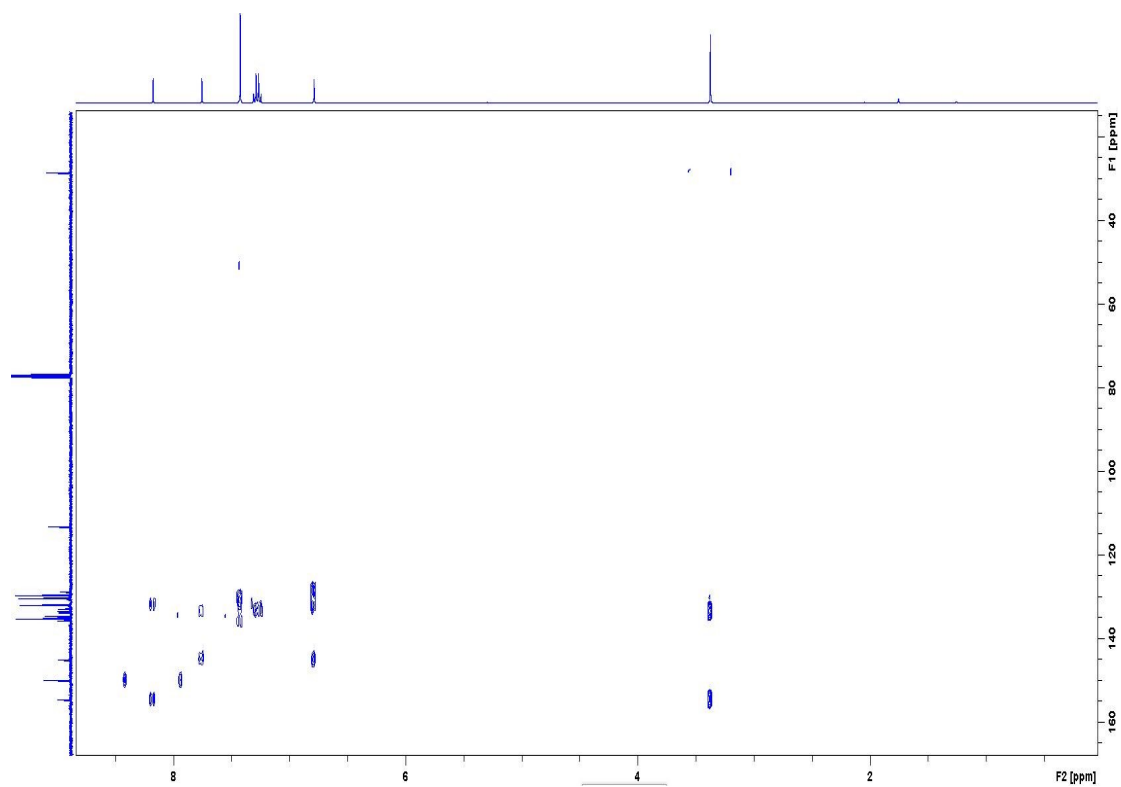

Fig. S76 HMBC spectrum of compound **6b**

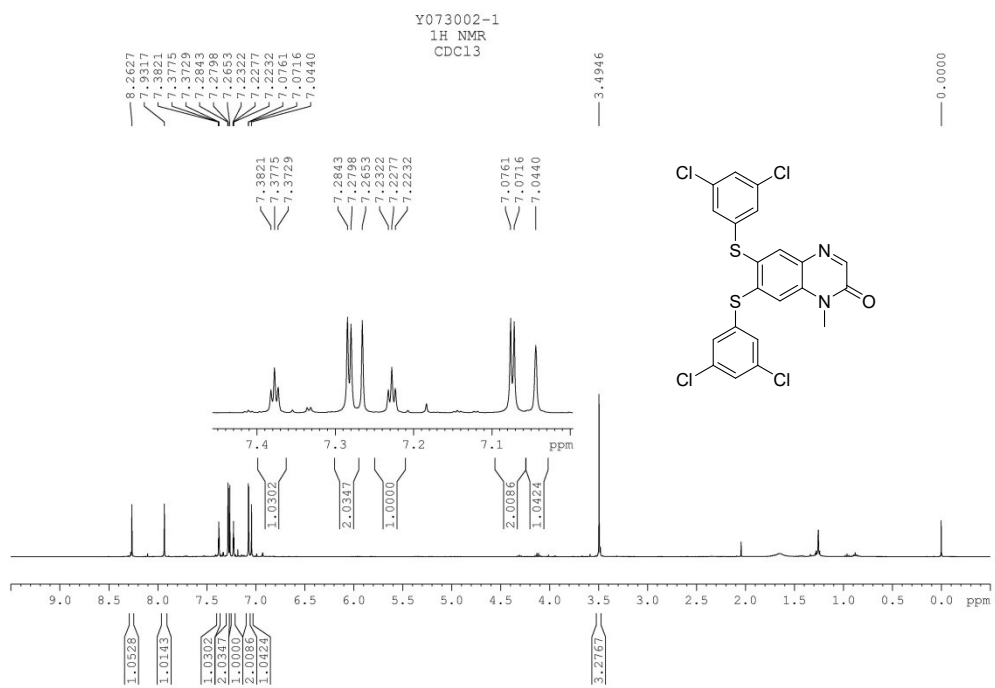

Fig. S77 <sup>1</sup>H NMR spectrum of compound **6c**

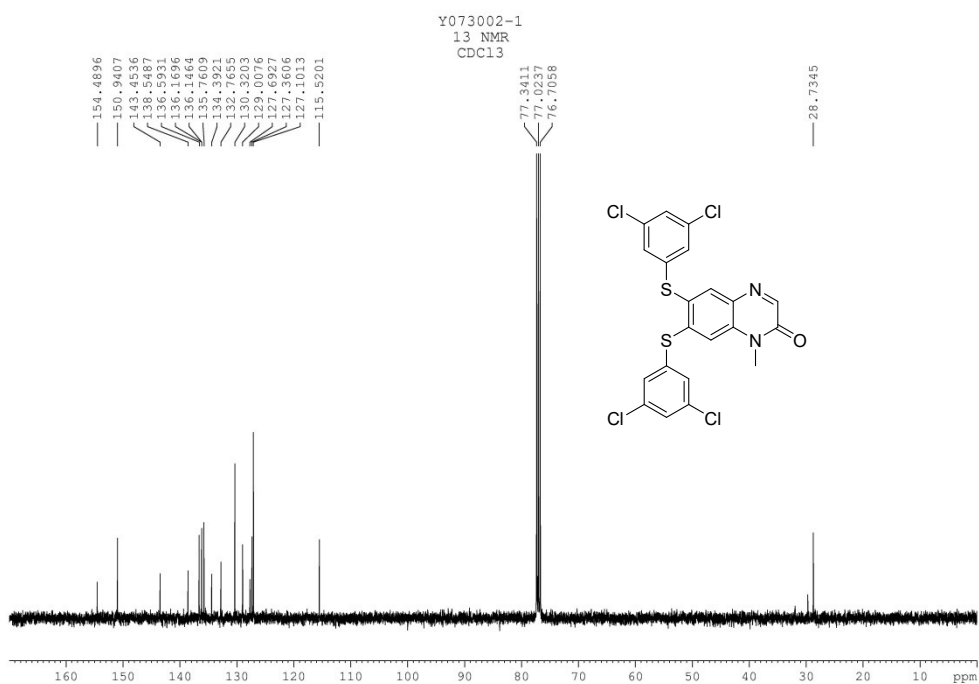

Fig. S78 <sup>13</sup>C NMR spectrum of compound 6c

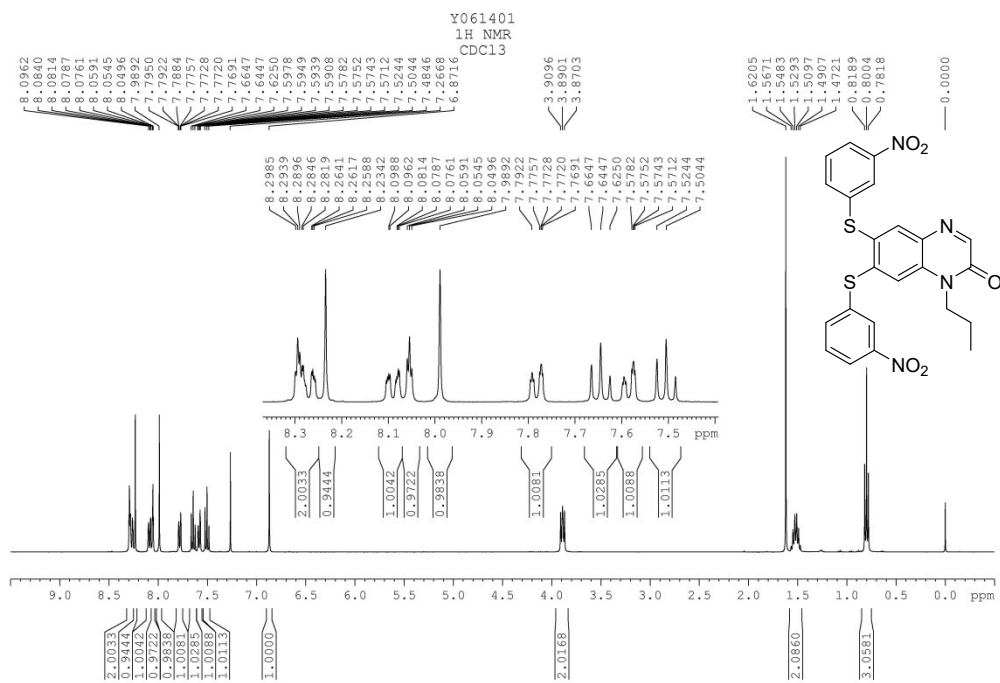

Fig. S79 <sup>1</sup>H NMR spectrum of compound 6d

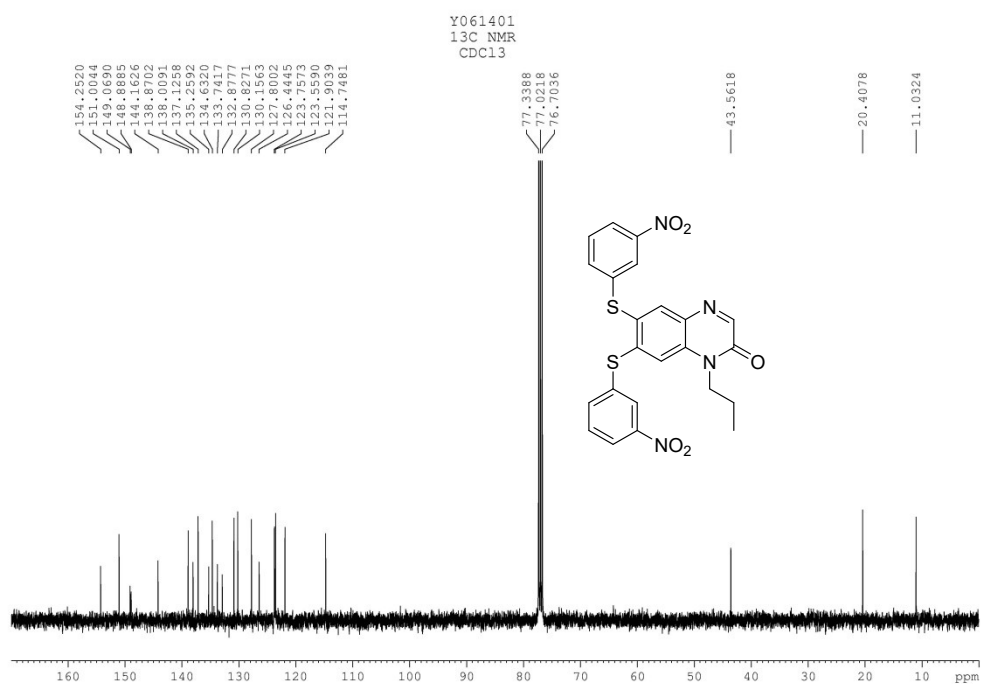

Fig. S80 <sup>13</sup>C NMR spectrum of compound 6d

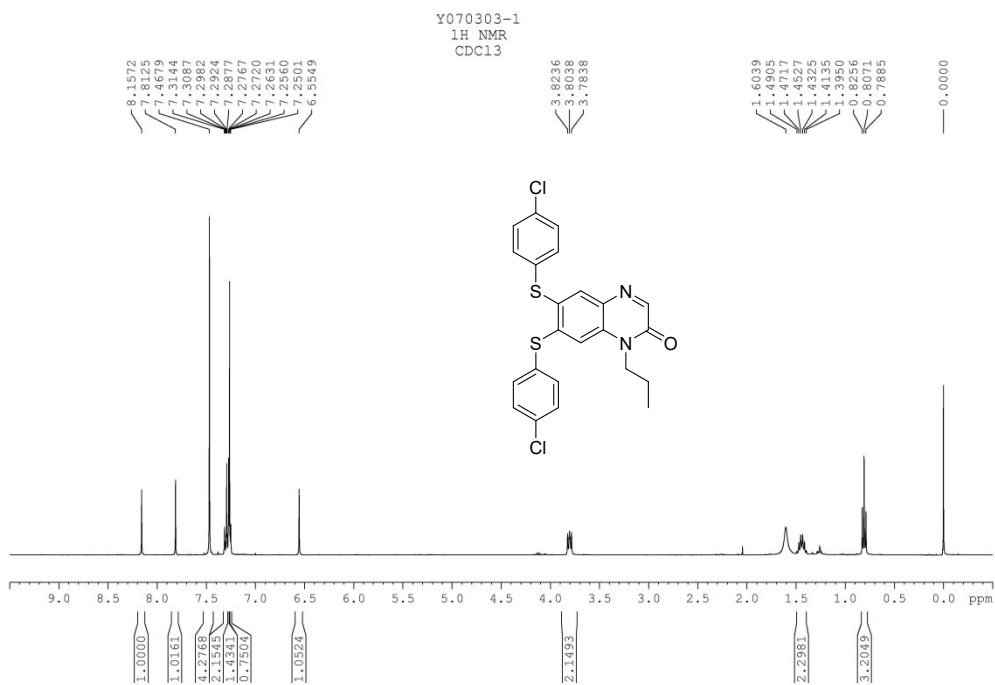

Fig. S81 <sup>1</sup>H NMR spectrum of compound 6e

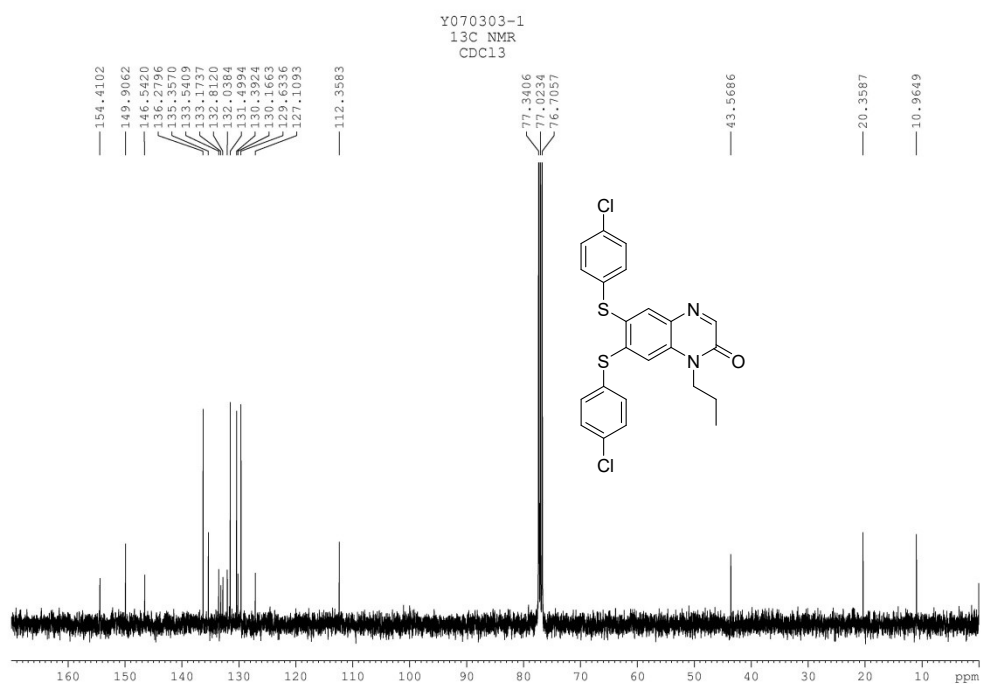

Fig. S82 <sup>13</sup>C NMR spectrum of compound 6e

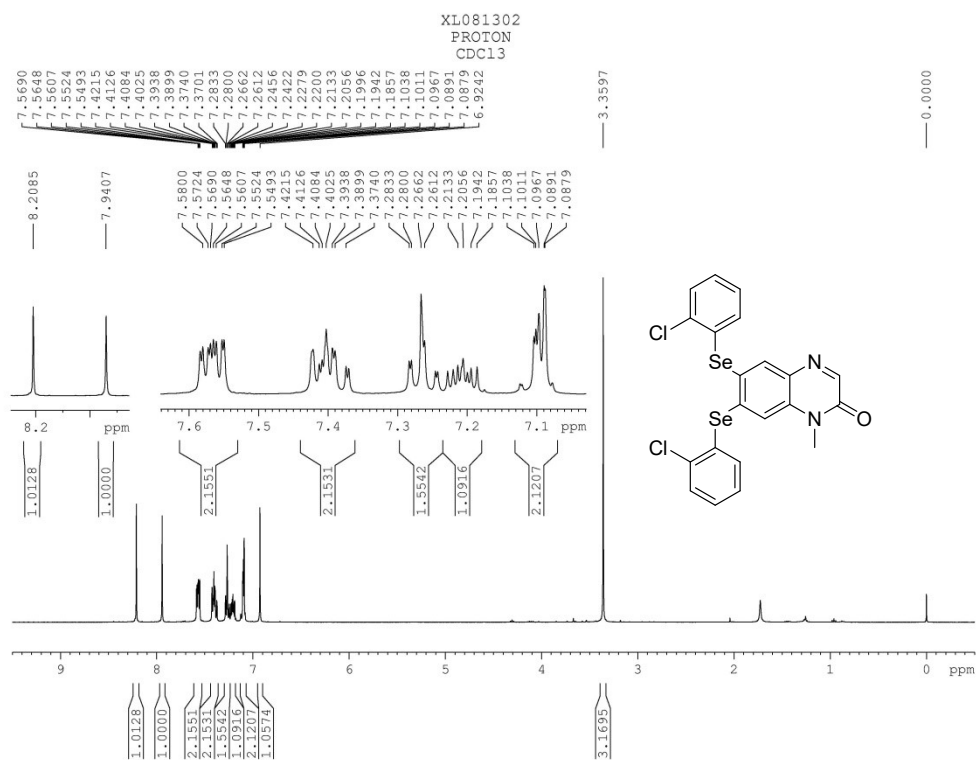

Fig. S83 <sup>1</sup>H NMR spectrum of compound 6f

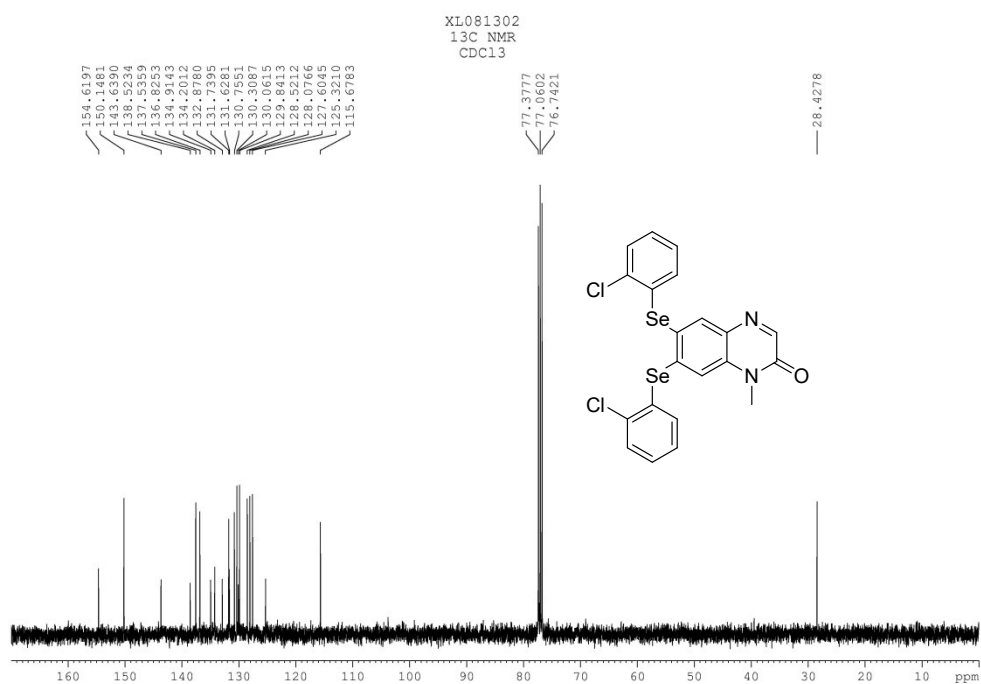

Fig. S84  $^{13}\text{C}$  NMR spectrum of compound **6f**

#### 4 Crystal structure and crystal data for compound **3b**

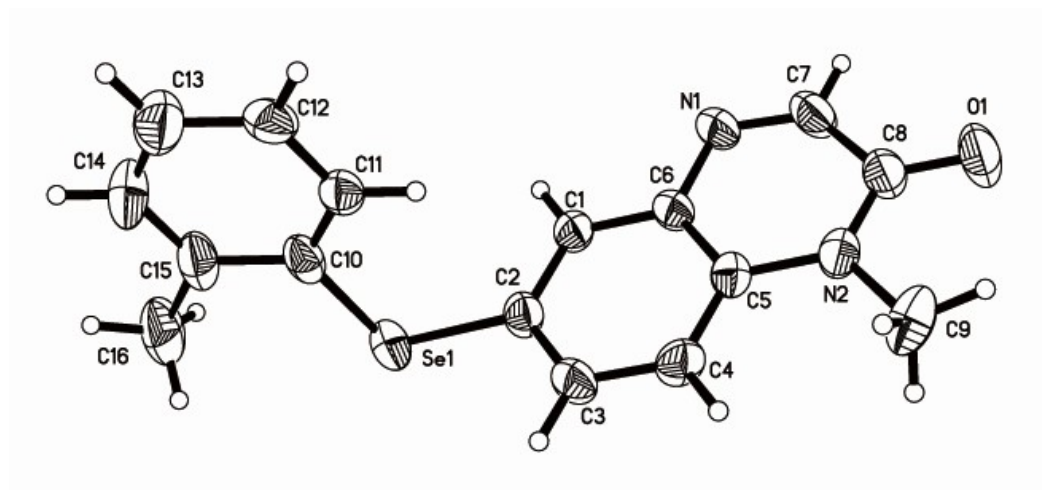

Fig. S85 Crystal structure of compound **3b**

**Table S2** Crystal data and structure refinement for **3b**

| Identification code                         | 3b                                                            |
|---------------------------------------------|---------------------------------------------------------------|
| Empirical formula                           | C <sub>16</sub> H <sub>14</sub> N <sub>2</sub> OSe            |
| Formula weight                              | 329.25                                                        |
| Temperature/K                               | 293(2)                                                        |
| Crystal system                              | monoclinic                                                    |
| Space group                                 | P2 <sub>1</sub> /n                                            |
| a/Å                                         | 7.7522(6)                                                     |
| b/Å                                         | 22.4728(12)                                                   |
| c/Å                                         | 8.7952(5)                                                     |
| α/°                                         | 90                                                            |
| β/°                                         | 111.858(8)                                                    |
| γ/°                                         | 90                                                            |
| Volume/Å <sup>3</sup>                       | 1422.11(17)                                                   |
| Z                                           | 4                                                             |
| ρ <sub>calc</sub> /g/cm <sup>3</sup>        | 1.538                                                         |
| μ/mm <sup>-1</sup>                          | 3.543                                                         |
| F(000)                                      | 664.0                                                         |
| Crystal size/mm <sup>3</sup>                | 0.246 × 0.149 × 0.082                                         |
| Radiation                                   | CuKα (λ = 1.54184)                                            |
| 2θ range for data collection/°              | 11.534 to 134.138                                             |
| Index ranges                                | -9 ≤ h ≤ 9, -26 ≤ k ≤ 17, -10 ≤ l ≤ 10                        |
| Reflections collected                       | 5344                                                          |
| Independent reflections                     | 2534 [R <sub>int</sub> = 0.0389, R <sub>sigma</sub> = 0.0533] |
| Data/restraints/parameters                  | 2534/0/183                                                    |
| Goodness-of-fit on F <sup>2</sup>           | 1.266                                                         |
| Final R indexes [ >=2σ (I)]                 | R <sub>1</sub> = 0.0825, wR <sub>2</sub> = 0.1935             |
| Final R indexes [all data]                  | R <sub>1</sub> = 0.0967, wR <sub>2</sub> = 0.2008             |
| Largest diff. peak/hole / e Å <sup>-3</sup> | 0.75/-0.43                                                    |

**Table S3** Fractional Atomic Coordinates ( $\times 10^4$ ) and Equivalent Isotropic Displacement Parameters ( $\text{\AA}^2 \times 10^3$ ) for **3b**.  $U_{\text{eq}}$  is defined as 1/3 of of the trace of the orthogonalised  $U_{ij}$  tensor.

| Atom | x           | y         | z         | U(eq)    |
|------|-------------|-----------|-----------|----------|
| Se1  | -1986.0(13) | 3679.7(4) | 806.3(11) | 74.1(4)  |
| O1   | 5314(10)    | 5608(3)   | 8169(8)   | 101(2)   |
| N1   | 3462(9)     | 4243(3)   | 6283(8)   | 65.2(17) |
| N2   | 3189(9)     | 5467(3)   | 5573(8)   | 59.7(15) |
| C1   | 1027(10)    | 4054(3)   | 3704(8)   | 56.6(17) |
| C2   | -297(11)    | 4239(3)   | 2248(8)   | 57.3(17) |
| C3   | -429(11)    | 4836(4)   | 1860(9)   | 66(2)    |
| C4   | 722(12)     | 5250(3)   | 2941(9)   | 69(2)    |
| C5   | 2032(11)    | 5064(3)   | 4435(8)   | 55.6(17) |
| C6   | 2189(10)    | 4458(3)   | 4794(8)   | 56.5(17) |
| C7   | 4423(11)    | 4630(4)   | 7322(10)  | 75(2)    |
| C8   | 4366(11)    | 5273(4)   | 7080(10)  | 70(2)    |
| C9   | 3140(16)    | 6105(4)   | 5237(14)  | 92(3)    |
| C10  | -522(12)    | 3373(3)   | -340(8)   | 63(2)    |
| C11  | 1251(11)    | 3564(3)   | -55(9)    | 60.4(18) |
| C12  | 2311(10)    | 3333(4)   | -928(10)  | 67(2)    |
| C13  | 1513(17)    | 2883(5)   | -2071(12) | 97(3)    |
| C14  | -270(17)    | 2700(5)   | -2341(12) | 95(3)    |
| C15  | -1326(14)   | 2931(4)   | -1515(10) | 79(3)    |
| C16  | -3313(16)   | 2726(5)   | -1857(13) | 107(4)   |

**Table S4** Anisotropic Displacement Parameters ( $\text{\AA}^2 \times 10^3$ ) for **3b**. The

Anisotropic displacement factor exponent takes the form: -

$$2\pi^2[h^2a^*2U_{11}+2hka^*b^*U_{12}+...].$$

| Atom | $U_{11}$ | $U_{22}$ | $U_{33}$ | $U_{23}$ | $U_{13}$ | $U_{12}$ |
|------|----------|----------|----------|----------|----------|----------|
| Se1  | 66.7(6)  | 79.5(6)  | 61.0(5)  | -15.1(4) | 6.3(4)   | -10.8(5) |
| O1   | 86(5)    | 108(5)   | 89(4)    | -41(4)   | 12(4)    | -28(4)   |
| N1   | 58(4)    | 68(4)    | 54(3)    | 3(3)     | 3(3)     | 6(3)     |
| N2   | 62(4)    | 54(3)    | 67(4)    | -14(3)   | 30(3)    | -8(3)    |
| C1   | 63(4)    | 44(4)    | 53(4)    | -1(3)    | 11(3)    | 4(3)     |
| C2   | 65(4)    | 55(4)    | 47(4)    | -3(3)    | 15(3)    | -2(3)    |
| C3   | 71(5)    | 66(5)    | 44(4)    | 6(3)     | 3(3)     | 6(4)     |
| C4   | 90(6)    | 45(4)    | 63(4)    | 12(3)    | 19(4)    | 12(4)    |
| C5   | 60(4)    | 55(4)    | 50(4)    | -8(3)    | 18(3)    | 0(3)     |
| C6   | 58(4)    | 56(4)    | 44(3)    | 3(3)     | 5(3)     | 6(3)     |
| C7   | 60(5)    | 86(6)    | 57(4)    | 0(4)     | -2(4)    | -2(4)    |
| C8   | 58(5)    | 82(6)    | 66(5)    | -18(4)   | 18(4)    | -7(4)    |
| C9   | 129(9)   | 55(5)    | 108(7)   | -17(5)   | 63(7)    | -16(5)   |
| C10  | 76(5)    | 51(4)    | 42(3)    | 6(3)     | 0(3)     | -5(4)    |
| C11  | 66(5)    | 51(4)    | 53(4)    | 3(3)     | 9(3)     | 6(3)     |
| C12  | 43(4)    | 83(6)    | 71(5)    | 3(4)     | 18(4)    | 3(4)     |
| C13  | 119(9)   | 97(8)    | 72(6)    | -15(5)   | 34(6)    | 7(7)     |
| C14  | 119(9)   | 93(7)    | 77(6)    | -41(5)   | 38(6)    | -26(6)   |
| C15  | 100(7)   | 64(5)    | 56(4)    | -11(4)   | 10(4)    | -16(5)   |
| C16  | 119(9)   | 90(7)    | 90(7)    | -32(6)   | 15(6)    | -41(7)   |



**Table S5** Bond Lengths for **3b**.

| Atom | Atom | Length/Å  | Atom | Atom | Length/Å  |
|------|------|-----------|------|------|-----------|
| Se1  | C2   | 1.915(7)  | C3   | C4   | 1.391(11) |
| Se1  | C10  | 1.906(9)  | C4   | C5   | 1.392(10) |
| O1   | C8   | 1.225(10) | C5   | C6   | 1.394(10) |
| N1   | C6   | 1.400(9)  | C7   | C8   | 1.458(12) |
| N1   | C7   | 1.281(10) | C10  | C11  | 1.372(11) |
| N2   | C5   | 1.399(9)  | C10  | C15  | 1.401(10) |
| N2   | C8   | 1.371(10) | C11  | C12  | 1.416(11) |
| N2   | C9   | 1.463(10) | C12  | C13  | 1.398(13) |
| C1   | C2   | 1.373(10) | C13  | C14  | 1.376(15) |
| C1   | C6   | 1.382(10) | C14  | C15  | 1.382(14) |
| C2   | C3   | 1.378(10) | C15  | C16  | 1.526(14) |

**Table S6** Bond Angles for **3b**.

| Atom | Atom | Atom | Angle/°  | Atom | Atom | Atom | Angle/°   |
|------|------|------|----------|------|------|------|-----------|
| C10  | Se1  | C2   | 101.1(3) | C5   | C6   | N1   | 121.4(7)  |
| C7   | N1   | C6   | 116.9(7) | N1   | C7   | C8   | 126.3(7)  |
| C5   | N2   | C9   | 121.9(7) | O1   | C8   | N2   | 123.4(9)  |
| C8   | N2   | C5   | 120.3(7) | O1   | C8   | C7   | 121.2(9)  |
| C8   | N2   | C9   | 117.7(7) | N2   | C8   | C7   | 115.4(7)  |
| C2   | C1   | C6   | 121.1(7) | C11  | C10  | Se1  | 122.9(6)  |
| C1   | C2   | Se1  | 120.6(5) | C11  | C10  | C15  | 119.8(9)  |
| C1   | C2   | C3   | 119.0(7) | C15  | C10  | Se1  | 117.3(7)  |
| C3   | C2   | Se1  | 120.4(6) | C10  | C11  | C12  | 122.0(7)  |
| C2   | C3   | C4   | 120.8(7) | C13  | C12  | C11  | 117.7(8)  |
| C3   | C4   | C5   | 120.1(7) | C14  | C13  | C12  | 119.2(10) |
| C4   | C5   | N2   | 122.0(7) | C13  | C14  | C15  | 123.4(9)  |
| C4   | C5   | C6   | 118.6(7) | C10  | C15  | C16  | 119.9(9)  |
| C6   | C5   | N2   | 119.5(7) | C14  | C15  | C10  | 117.8(9)  |
| C1   | C6   | N1   | 118.2(7) | C14  | C15  | C16  | 122.3(8)  |
| C1   | C6   | C5   | 120.3(6) |      |      |      |           |

**Table S7** Torsion Angles for **3b**.

| <b>A</b> | <b>B</b> | <b>C</b> | <b>D</b> | <b>Angle/°</b> | <b>A</b> | <b>B</b> | <b>C</b> | <b>D</b> | <b>Angle/°</b> |
|----------|----------|----------|----------|----------------|----------|----------|----------|----------|----------------|
| Se1      | C2       | C3       | C4       | 176.3(7)       | C6       | C1       | C2       | Se1      | -176.5(6)      |
| Se1      | C10      | C11      | C12      | -179.5(6)      | C6       | C1       | C2       | C3       | 1.6(13)        |
| Se1      | C10      | C15      | C14      | -179.2(7)      | C7       | N1       | C6       | C1       | -174.8(8)      |
| Se1      | C10      | C15      | C16      | 1.4(11)        | C7       | N1       | C6       | C5       | 2.6(12)        |
| N1       | C7       | C8       | O1       | 178.3(9)       | C8       | N2       | C5       | C4       | 175.2(8)       |
| N1       | C7       | C8       | N2       | -1.4(14)       | C8       | N2       | C5       | C6       | -5.1(11)       |
| N2       | C5       | C6       | N1       | 1.0(12)        | C9       | N2       | C5       | C4       | -2.2(12)       |
| N2       | C5       | C6       | C1       | 178.4(7)       | C9       | N2       | C5       | C6       | 177.5(8)       |
| C1       | C2       | C3       | C4       | -1.8(13)       | C9       | N2       | C8       | O1       | 3.0(13)        |
| C2       | C1       | C6       | N1       | 177.7(7)       | C9       | N2       | C8       | C7       | -177.3(8)      |
| C2       | C1       | C6       | C5       | 0.2(13)        | C10      | C11      | C12      | C13      | -2.0(12)       |
| C2       | C3       | C4       | C5       | 0.2(14)        | C11      | C10      | C15      | C14      | 0.7(13)        |
| C3       | C4       | C5       | N2       | -178.6(8)      | C11      | C10      | C15      | C16      | -178.7(8)      |
| C3       | C4       | C5       | C6       | 1.6(13)        | C11      | C12      | C13      | C14      | 2.3(15)        |
| C4       | C5       | C6       | N1       | -179.2(8)      | C12      | C13      | C14      | C15      | -1.1(18)       |
| C4       | C5       | C6       | C1       | -1.8(12)       | C13      | C14      | C15      | C10      | -0.4(17)       |
| C5       | N2       | C8       | O1       | -174.6(8)      | C13      | C14      | C15      | C16      | 179.0(11)      |
| C5       | N2       | C8       | C7       | 5.2(11)        | C15      | C10      | C11      | C12      | 0.6(11)        |
| C6       | N1       | C7       | C8       | -2.4(14)       |          |          |          |          |                |

**Table S8** Hydrogen Atom Coordinates ( $\text{\AA}\times 10^4$ ) and Isotropic Displacement Parameters ( $\text{\AA}^2\times 10^3$ ) for **3b**.

| Atom | x     | y    | z     | U(eq) |
|------|-------|------|-------|-------|
| H1   | 1144  | 3651 | 3960  | 68    |
| H3   | -1298 | 4963 | 863   | 79    |
| H4   | 617   | 5651 | 2666  | 82    |
| H7   | 5234  | 4488 | 8327  | 90    |
| H9A  | 1946  | 6262 | 5124  | 137   |
| H9B  | 3349  | 6171 | 4241  | 137   |
| H9C  | 4091  | 6302 | 6126  | 137   |
| H11  | 1773  | 3855 | 736   | 73    |
| H12  | 3497  | 3476 | -748  | 80    |
| H13  | 2179  | 2710 | -2643 | 116   |
| H14  | -791  | 2405 | -3119 | 115   |
| H16A | -3382 | 2555 | -883  | 160   |
| H16B | -3667 | 2435 | -2716 | 160   |
| H16C | -4138 | 3061 | -2189 | 160   |

## 5. <sup>1</sup>H NMR spectra of Selectfluor, PhSeSePh, PhSeSePh + Selectfluor, etc

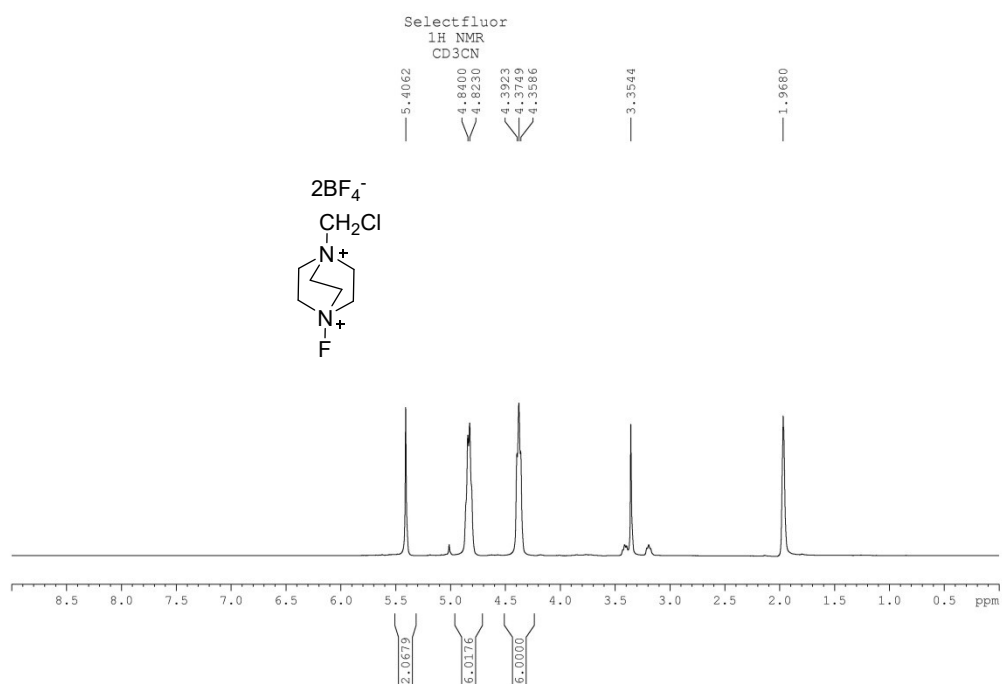

Fig. S86 <sup>1</sup>H NMR spectrum of Selectfluor

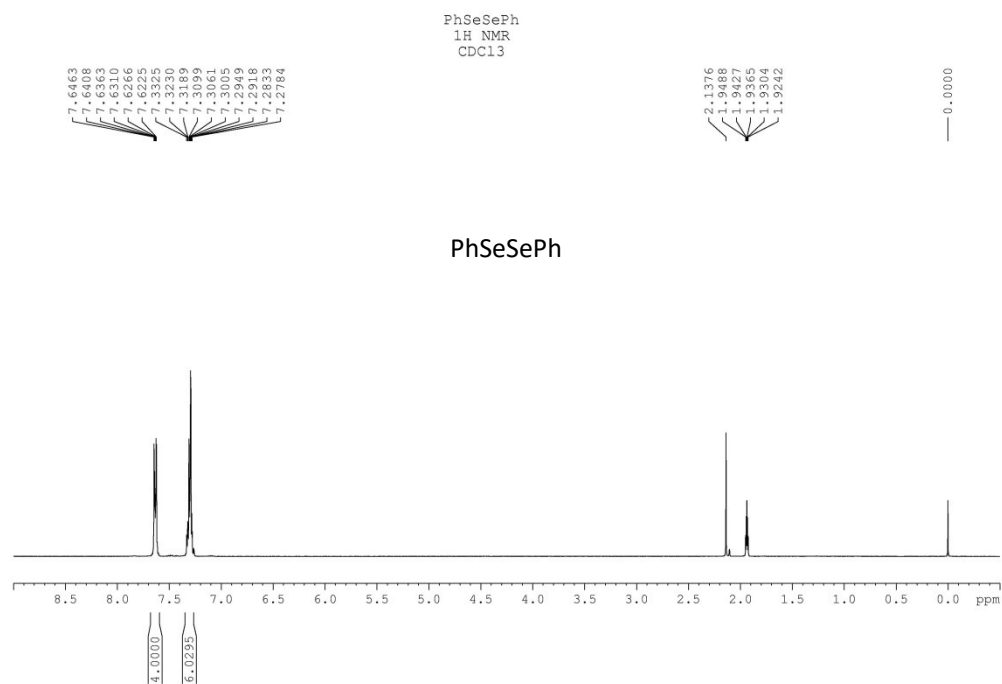

Fig. S87 <sup>1</sup>H NMR spectrum of PhSeSePh

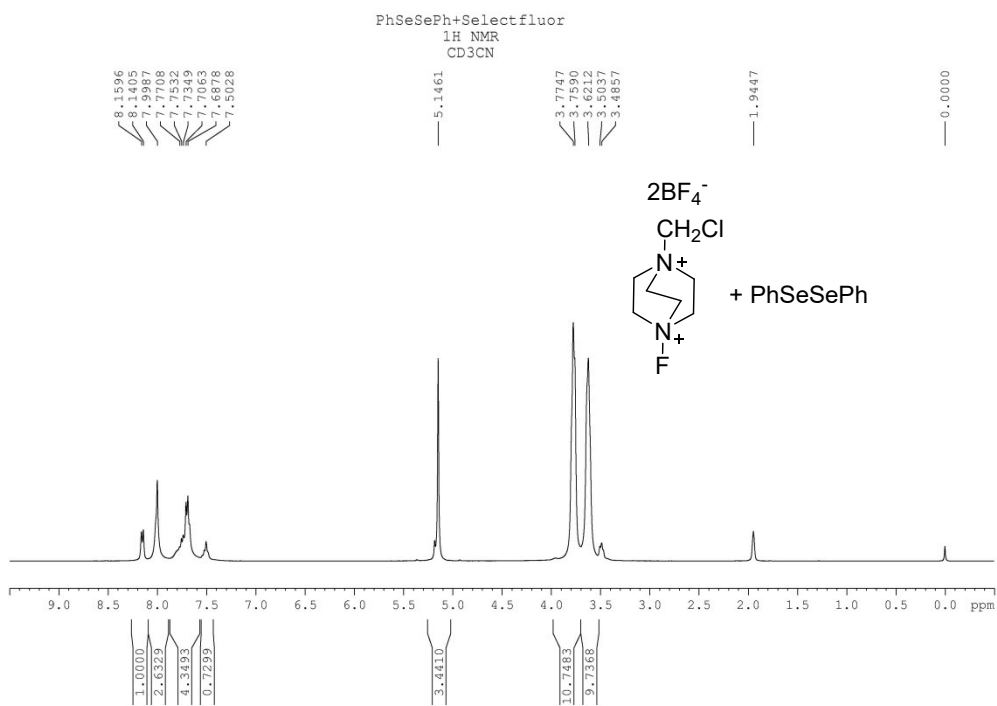

Fig. S88 <sup>1</sup>H NMR spectrum of Selectfluor + PhSeSePh

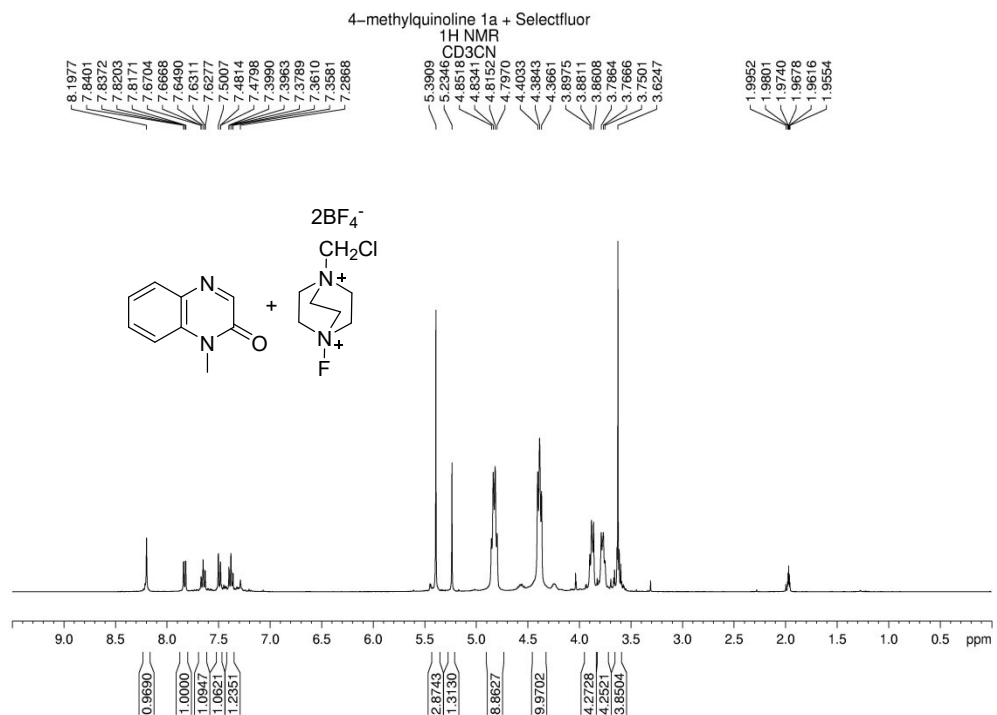

Fig. S89 <sup>1</sup>H NMR spectrum of 4-methylquinoline 1a + Selectfluor
